1 **Short title:** Highly Organ-specific Rhythms in Sugarcane

2 **Carlos Takeshi Hotta (hotta@iq.usp.br)**

3

4 **Article title: Rhythms of Transcription in Field-Grown Sugarcane Are Highly**  
5 **Organ Specific**

6 Luíza Lane de Barros Dantas<sup>1,2</sup>, Felipe Marcelo Almeida-Jesus<sup>1</sup>, Natalia Oliveira de  
7 Lima<sup>1</sup>, Cícero Alves-Lima<sup>1</sup>, Milton Yutaka Nishiyama-Jr<sup>3</sup>, Monalisa Sampaio Carneiro<sup>4</sup>,  
8 Glaucia Mendes Souza<sup>1</sup>, Carlos Takeshi Hotta<sup>1\*</sup>

9 1 Departamento de Bioquímica, Instituto de Química, Universidade de São Paulo, São  
10 Paulo, SP, 05508-000, Brazil

11 2 Present address: Max Planck Institute for Molecular Plant Physiology, Potsdam-  
12 Golm, 14476, Germany

13 3 Laboratório Especial de Toxicologia Aplicada, Instituto Butantan, São Paulo, SP,  
14 05503-900, Brazil

15 4 Departamento de Biotecnologia e Produção Vegetal e Animal, Centro de Ciências  
16 Agrárias, Universidade Federal de São Carlos, São Carlos, SP, 13600-970, Brazil.

17 **One sentence summary:** The rhythmic transcriptome of field-grown sugarcane is  
18 highly organ-specific.

19 **Short title:** Highly Organ-specific Rhythms in Sugarcane

20

## 21 **Author Contributions**

22 Conceptualization, L.L.B.D., M.S.C., G.M.S., C.T.H; Methodology, L.L.B.D., C.T.H;  
23 Software, M.Y.N., C.T.H; Validation, L.L.B.D., N.O.L., F.M.A.J.; Investigation, L.L.B.D.,  
24 N.O.L., C.A.L., C.T.H; Resources, M.S.C., G.M.S.; Data Curation, M.Y.N., C.T.H;  
25 Writing – Original Draft, L.L.B.D., C.T.H; Writing – Review & Editing, L.L.B.D., C.A.L.,  
26 C.T.H; Visualization; C. T. H.; Project Administration, C. T. H.; Funding Acquisition,  
27 C.T.H

28

29 **Competing Interests**

30 The authors have no competing interests to declare.

31

32 **Acknowledgements:** This work was supported by the São Paulo Research  
33 Foundation (FAPESP) (grant nos. 11/00818-8 and 15/06260-0; BIOEN Program) and  
34 by the Serrapilheira Institute (grant no. Serra-1708-16001). L.L.B.D, C. A. L., and N. O.  
35 L. were supported by FAPESP scholarships (grants 11/08897-4, 13/05301-9, and  
36 16/06740-4, respectively). F.M.A.J was supported by CAPES scholarships (Finance  
37 Code 001).

38

39 **\*Correspondence:** Carlos Takeshi Hotta (hotta@iq.usp.br)

40

## 41 **Abstract**

42 We investigated whether different specialized organs in field-grown sugarcane follow  
43 the same temporal rhythms in transcription. We assayed the transcriptomes of three  
44 organs during the day: leaf, a source organ; internodes 1 and 2, sink organs focused  
45 on cell division and elongation; and internode 5, a sink organ focused on sucrose  
46 storage. The leaf had twice as many rhythmic transcripts (>68%) as internodes, and  
47 the rhythmic transcriptomes of the two internodes were more similar to each other than  
48 to those of the leaves. More transcripts were rhythmic under field conditions than under  
49 circadian conditions and most of their peaks were during the day. Among the  
50 transcripts that were considered expressed in all three organs, only 7.4% showed the  
51 same rhythmic time course pattern. The central oscillators of these three organs — the  
52 networks that generate circadian rhythms — had similar dynamics with different  
53 amplitudes. The differences between the rhythmic transcriptomes in circadian  
54 conditions and field conditions highlight the importance of field experiments to  
55 understand the plant circadian clock *in natura*. The highly specialized nature of the  
56 rhythmic transcriptomes in sugarcane organs probably arises from amplitude  
57 differences in tissue-specific circadian clocks and different sensitivities to  
58 environmental cues.

59

## 60 **Introduction**

61 The circadian clock is an endogenous signaling network that allows organisms to adapt  
62 to rhythmically changing environments. Plants with a circadian clock synchronized with  
63 environmental rhythms accumulate more biomass and have better fitness than plants  
64 with defective or no circadian clocks<sup>1,2</sup>. In crops, changes in the circadian clock have  
65 been indirectly selected through traditional breeding to change photoperiodic  
66 responses, such as the transition to flowering. For example, the circadian clocks of  
67 European tomatoes have longer periods than those of native American tomatoes, as  
68 such periods allow these crops to adapt better to the long summer days occurring at  
69 the high latitudes of much of Europe<sup>3</sup>. Similarly, some genotypes of *Hordeum vulgare*  
70 L. (barley) and *Triticum aestivum* L. (wheat) carry mutations in their circadian clock  
71 genes that reduce flowering induced by photoperiodic triggers, allowing cultivation in  
72 higher latitudes in Europe<sup>4,5</sup>.

73 The circadian clock is conceptually divided into three associated parts: the *Input*  
74 *Pathways*, the *Central Oscillator*, and the *Output Pathways*. The *Input Pathways* detect  
75 entraining cues that keep the circadian clock continuously synchronized to the  
76 environment. In plants, these cues include light, temperature, and sugar levels<sup>6-8</sup>. The  
77 *Central Oscillator* is a series of interlocking transcriptional-translational feedback loops  
78 that can generate 24-h rhythms independently of the environment. In *Arabidopsis*  
79 *thaliana* (L.) Heynh. (*Arabidopsis*), one loop, called the morning loop, starts with the  
80 light induction of *CIRCADIAN CLOCK ASSOCIATED1 (CCA1)* and *LATE*  
81 *ELONGATED HYPOCOTYL (LHY)* at dawn. Next, *PSEUDO-RESPONSE*  
82 *REGULATOR7 (PRR7)* and *PRR9* are activated by CCA1 and LHY. In turn, CCA1 and  
83 LHY are repressed by PRR7 and PRR9. In the core loop, CCA1 and LHY are  
84 repressed, and this represses *TIME FOR CAB EXPRESSION1 (TOC1)*, also known as  
85 *PRR1*. During the night, TOC1 forms an interaction known as the evening loop with the  
86 EVENING COMPLEX (EC). The EC is a protein complex formed by EARLY  
87 FLOWERING3 (ELF3), ELF4, and LUX ARRHYTHMO (LUX) that also inhibits the  
88 expression of *PRR7* and *PRR9* the next morning. Other essential components of the  
89 oscillator include GIGANTEA (GI), REVEILLE8 (RVE8), and CCA1 HIKING  
90 EXPEDITION (CHE)<sup>8-11</sup>. The *Output Pathways* transduce the temporal information  
91 generated by the interaction between the *Central Oscillator* and the *Input Pathways* to  
92 a plethora of biochemical pathways. The circadian clock thus has a broad impact  
93 throughout the plant, regulating processes such as photosynthesis, cell elongation,  
94 stomata opening, and flowering<sup>12</sup>.

95 Even though the plant circadian clock is highly conserved, there are a few differences  
96 between the circadian clocks of *Arabidopsis* and grasses (Poales). For instance, there  
97 is only copy of the paralogs *CCA1/LHY*, usually assigned as *LHY*<sup>13</sup>. The grass PRRs  
98 consist of *TOC1*, *PRR37*, *PRR73*, *PRR59*, and *PRR95*, and it is not clear whether they  
99 have the same functions as their *Arabidopsis* counterparts, even though they are  
100 capable of complementing *Arabidopsis* mutations<sup>13,14</sup>. In sugarcane, a highly polyploid  
101 crop that accumulates sucrose in the culm, the circadian clock has high-amplitude  
102 rhythms and regulates a large proportion of the leaf transcriptome (>30%)<sup>15,16</sup>.

103 Most research to date on plant circadian rhythms has been done in controlled  
104 conditions, inside a growth room or growth chamber. Under such circumstances, plants  
105 can be grown either under circadian conditions, in which they are kept under constant  
106 abiotic conditions as a means to separate endogenous rhythms from rhythms driven by  
107 the environment, or under diel conditions, in which they are subjected to abiotic  
108 rhythms such as light/dark and warm/cold. Abiotic changes in controlled conditions are

109 usually stepwise, in contrast to the gradients found in natural or field conditions, which  
110 can lead to significant changes in plant physiology<sup>17–19</sup>. For example, different patterns  
111 of metabolite rhythms are observed if plants are grown under white fluorescent tubes,  
112 light-emitting diodes that simulate the sunlight spectrum, or naturally illuminated  
113 greenhouse<sup>18</sup>. In another study, the period and phase of the circadian clock affected  
114 shoot and rosette branch numbers in multiple *Arabidopsis* mutants in natural, but not  
115 controlled, conditions<sup>20</sup>. Finally, the rice mutant *osgi*, which has a late-flowering  
116 phenotype in controlled conditions, flowered at the same time as the wild type in field  
117 conditions<sup>21</sup>.

118 Only two plant species have had their rhythmic transcripts identified in field conditions:  
119 rice and pineapple<sup>21–24</sup>. However, these studies focused on the leaves. To better  
120 understand how the plant circadian clock regulates transcription under natural  
121 conditions in different organs, we measured transcription in three organs of field-grown  
122 sugarcane grown during the day. We harvested leaf +1 (L1), a source organ, and two  
123 sink organs: internodes 1 and 2 (I1), organs focused on cell division and cell elongation  
124 that includes the shoot apical meristem; and internode 5 (I5), an organ focused on  
125 sucrose accumulation. We describe in detail one cycle (24 h) with 14 time points,  
126 starting 2 h before dawn. This approach allowed us to obtain a better resolution to  
127 describe transcripts with fast dynamics. We found that the rhythmic transcripts of the  
128 L1, I1, and I5 are widely specialized and likely to respond differently to environmental  
129 cues.

130

## 131 **Results**

132

### 133 *A significant proportion of the sugarcane transcriptome is rhythmic in diel conditions*

134 We planted a field of commercial sugarcane (*Saccharum* hybrid SP80-3280) in autumn  
135 2012 in Araras (Brazil, 22°18'41.0"S, 47°23'05.0"W). Nine months later (summer 2013),  
136 after a dry winter and spring (Fig. S1), we did a time course experiment in which the  
137 leaf +1 (L1), internodes 1 and 2 (I1), and internode 5 (I5) were harvested every 2 h for  
138 26 h, starting 2 h before dawn. On the day of harvest, the stalks were  $76 \pm 0.16$  cm,  
139 with  $11 \pm 2$  internodes, and their sugar content was  $12.0 \pm 1.4^\circ\text{Bx}$  (mean  $\pm$  SD;  $n = 20$ ).  
140 The temperature varied throughout the day from 17°C to 30°C, with the maximum

141 occurring at 11 h after dawn (ZT11); the maximum light intensity was 2.67 MJ/m<sup>2</sup> at  
142 ZT07, and dusk occurred 13.25 h after dawn (ZT13.25) (Fig. S1B and D).

143 RNA extracted from each organ was hybridized in 44k custom oligoarrays<sup>15,25</sup>. The  
144 data from the time course experiment generated 14,521 time series with 14 time points.  
145 After the selection of time points that had a signal above the background noise (Figure  
146 S3A), we had 12,501 transcripts considered to be expressed in at least one organ (Fig.  
147 1). L1 had 9,822 expressed transcripts, 94.3% of them were also expressed in a  
148 previous circadian experiment<sup>15</sup> (Fig. 1B). I1 had the highest number of expressed  
149 transcripts (12,053), followed by I5 (10,448). A total of 9,380 transcripts were  
150 expressed in all three organs (75.0%, Fig. 1E). I1 and I5 shared the most substantial  
151 proportion of the expressed transcripts (89.3%), and I1 had the most substantial  
152 proportion of unique expressed transcripts (7.5%).

153 We identified rhythmic transcripts by combining a weighted correlation network analysis  
154 (WGCNA) that grouped expressed transcripts in coexpression modules<sup>26</sup> with  
155 JTK\_CYCLE, which identified which of the modules contained rhythmic transcripts<sup>27</sup>  
156 (Figure S3B). This method identified 6,705 rhythmic transcripts in L1 (68.3%), 3,755 in  
157 I1 (31.2%), and 3,242 in I5 (28.8%) (Fig. 1A and Fig. S6). As a comparison, 32.1% of  
158 the transcripts were rhythmic in L1 under circadian conditions<sup>15</sup>. The overlap between  
159 circadian transcripts and rhythmic transcripts in the field (in diel conditions) was 2,623,  
160 representing 76.4% of circadian transcripts and 60.1% of rhythmic transcripts (Fig. 1C).

161

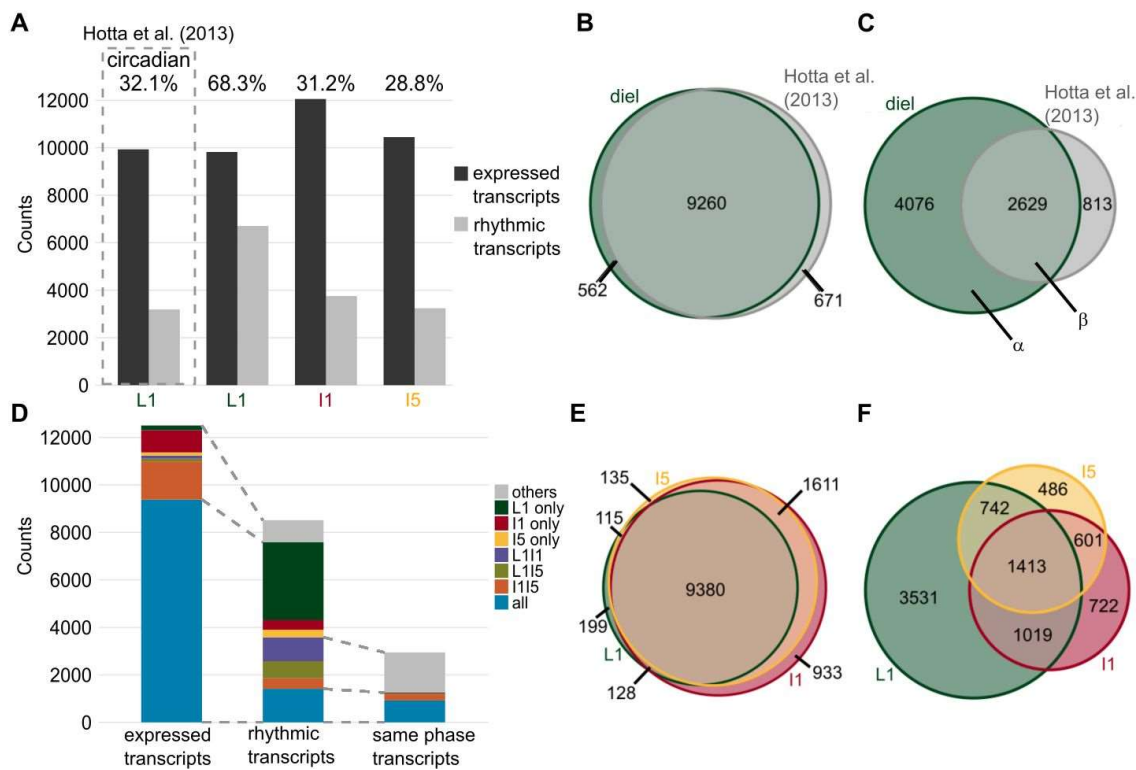

162

163 **Figure 1 – Different organs have specific sets of rhythmic transcripts in**  
 164 **sugarcane. (A)** The numbers of expressed and rhythmic transcripts detected in leaf +1  
 165 (L1), internodes 1 and 2 (I1), and internode 5 (I5) in field-grown (diel) conditions, and in  
 166 leaf +1 in circadian conditions published in Hotta et al. (2013)<sup>15</sup>. **(B, C)** Euler diagrams  
 167 of expressed transcripts **(B)** and rhythmic transcripts **(C)** in L1 in sugarcane in diel  
 168 (green) and circadian (gray) conditions. **(D)** Number of expressed transcripts, rhythmic  
 169 transcripts, and rhythmic transcripts with the same phase that were found specifically in  
 170 L1, I1, or I5; in both L1 and I1 (L1I1, purple); in both L1 and I5 (L1I5, light green); in  
 171 both I1 and I5 (I1I5, orange); and in all three organs (L1I1I5, blue). In the second bar,  
 172 the gray area corresponds to rhythmic transcripts that are expressed in only one or two  
 173 organs. In the third bar, the gray area corresponds to rhythmic transcripts in only two  
 174 organs that have the same phase. The gray dashed lines show the associations among  
 175 bars. **(E, F)** Euler diagram of expressed and rhythmic transcripts in L1, I1, and I5 in  
 176 field-grown sugarcane in diel conditions.

177

178 *Different sets of transcripts are rhythmic in different sugarcane organs*

179 Although most expressed transcripts were found in all three organs, only 1,413 of the  
 180 expressed transcripts were rhythmic in all three organs (16.6%) (Fig. 1D, F). L1 had the  
 181 largest proportion of unique rhythmic transcripts (41.5%), followed by I1 (8.5%) and



182 then I5 (5.7%) (Fig. 1F). Transcripts that were expressed only in one organ were less  
183 likely to be rhythmic (60.3% for L1, 8.6% for I1, and 8.4% for I5) (Fig. 1H).

184 We estimated the phase of the transcripts by combining the phase calculated using  
185 JTK\_CYCLE with a dendrogram of the representative time course of each module.  
186 Among the transcripts that were rhythmic in more than one organ, 27% had rhythms  
187 with phase differences >2 h (Fig. 1D). Overall, among the 12,501 unique expressed  
188 transcripts in the three organs, only 7.4% (923) showed rhythms with the same phase  
189 in the three organs. Most of the transcripts peaked during the day: this was true of  
190 80.3% in L1, 90.4% in I1, and 96.3% in I5 (the photoperiod was 13.25 h, or 56.3% of a  
191 cycle) (Fig. 1G). In L1, 2,363 transcripts peaked between dawn (ZT00) and 2 h after  
192 dawn (ZT02) (35.2%), and 1,232 transcripts peaked at ZT12 (18.4%) (Fig. 2A). When  
193 we separated rhythmic L1 transcripts into those that were also rhythmic in circadian  
194 conditions (Fig. 2B,  $\alpha$ ) and those that were not (Fig. 2B,  $\beta$ ), two different phase  
195 distributions could be observed (Fig. 2C). The  $\alpha$  group had most transcripts peaking at  
196 ZT00-02 (39.1%), followed by ZT12 (14.0%), while the  $\beta$  group peaked at ZT12  
197 (25.1%), followed by ZT02 (19.1%). In I1, 1,201 transcripts peaked at ZT0 (32.0%) and  
198 716 peaked at ZT8 (19.1%). In I5, 1,373 transcripts peaked at ZT0 (42.4%) and 894  
199 peaked at ZT8 (27.6%) (Fig. 2A).

200 The majority of transcripts from L1 (65.8%) grown in diel conditions had the same  
201 phase ( $\pm 2$  h) in leaves grown under circadian conditions (Fig. S7A). More transcripts  
202 showed a delayed peak (19.6%) rather than an advanced peak (13.9%) under diel  
203 conditions than under circadian conditions. When we compared L1 and I1 transcripts,  
204 65.8% had the same phase, with the remainder divided roughly evenly between  
205 delayed and advanced phases (16.1% and 14.9%, respectively) (Fig. S7B). Similarly,  
206 67.1% of the L1 transcripts had the same phase as I5, 14.2% had a delayed phase,  
207 and 14.8% had an advanced phase (Fig. S7C). The phases were most similar between  
208 I1 and I5 transcripts: 93.8% had the same phases, 2.8% a phase delay, and 3.1% a  
209 phase advance (Fig. S7D).

210



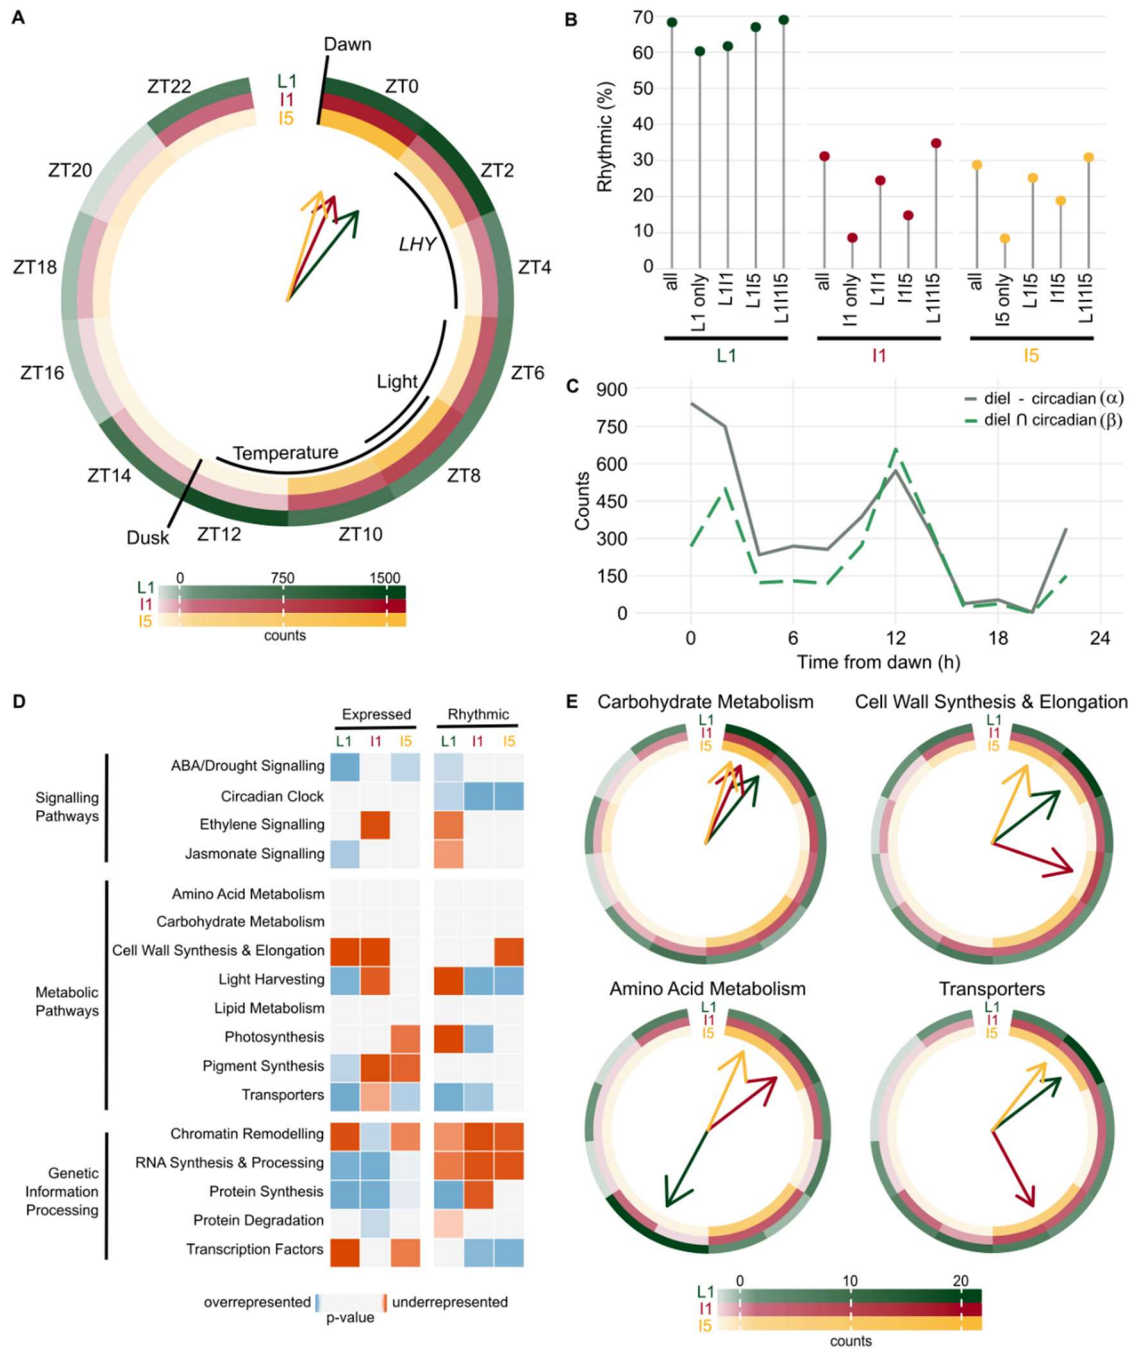

211

212 **Figure 2 – Transcripts have unique phases in different sugarcane organs. (A)**

213 Circular heatmap of the rhythmic transcript peak time (ZT0 = 0 h after dawn)

214 distribution in leaf +1 (L1), internodes 1 and 2 (I1), and internode 5 (I5). The colored

215 arrows show the times at which the most transcripts are found in each organ. The

216 times of dawn, dusk, *LHY* transcription peak, maximum light intensity, and maximum

217 temperatures are indicated by black arcs. **(B)** Proportions of transcripts that were

218 rhythmic in L1, I1, and I5 among all expressed transcripts in each organ (All), among

219 the transcripts expressed only in one organ (L1 only, I1 only, or I5 only), among the

220 transcripts expressed in two organs (L1I1, L1I5, or I1I5), and among transcripts

221 expressed in all three organs (L1I1I5). **(C)** Distribution of rhythmic transcript peak time  
222 in transcripts that were rhythmic in L1 but not in circadian conditions ( $\alpha$  in Fig. 1C) and  
223 rhythmic transcripts in transcripts that were rhythmic in L1 and circadian conditions ( $\beta$ ).  
224 **(D)** Heatmap of functional categories that are overrepresented (shades of blue) or  
225 underrepresented (shades of red) among the expressed and rhythmic transcripts of L1,  
226 I1, and I5. The *P*-value was calculated using a hypergeometric test. **(E)** Circular  
227 heatmap with the distribution of the peak times of rhythmic transcripts associated with  
228 the pathways *Carbohydrate Metabolism*, *Cell Wall Synthesis & Elongation*, *Amino Acid*  
229 *Metabolism*, and *Transporters*.

230

### 231 *Biochemical pathways have different rhythms in sugarcane organs*

232 We used a hypergeometric test to detect if a pathway was over- or underrepresented  
233 by comparing the frequency of transcripts associated with a Biochemical Pathway  
234 among the expressed transcripts and all the unique transcripts in the oligoarray (Fig.  
235 2D and Fig. ). We used the same test comparing the frequency of transcripts  
236 associated with a Biochemical Pathway among the rhythmic transcripts and the  
237 expressed transcripts (Fig. 2D and Fig. S8). The transcript annotations were based on  
238 the SUCEST database annotation (<http://sucest-fun.org>).

239 Among expressed transcripts, each organ has a distinct profile. For example, L1 was  
240 the only organ that had the *Pigment Synthesis*, *Light Harvesting*, and *Jasmonate*  
241 *Signaling* pathways considered to be overrepresented. I1 had *Chromatin Remodeling*  
242 and *Protein Synthesis* pathways overrepresented and *Ethylene Signaling*  
243 underrepresented. *Transcription Factors* was underrepresented and *ABA/Drought*  
244 *Signaling* and *Transporters* were overrepresented in L1 and I5, but not in I1. I5 is the  
245 only organ in which *Cell Wall Synthesis & Elongation* was not underrepresented among  
246 the expressed transcripts (Fig. 2D). Among rhythmic transcripts, *Circadian Clock* was  
247 overrepresented, while *Chromatin Remodeling* and *RNA Synthesis & Processing* were  
248 underrepresented in all organs. *Protein Synthesis* was overrepresented in L1.  
249 *Transcription Factors* was overrepresented in I1 and I5, and *Transporters* was  
250 overrepresented among rhythmic transcripts in L1 and I1 (Fig. 2D).

251 When we analyzed transcripts associated with important pathways for sugarcane  
252 growth, we found further organ-specific patterns; these differences could be seen in  
253 both expressed and rhythmic transcripts, as well as the phase of the rhythmic  
254 transcripts (Fig. 2E and Fig. S9). Transcripts associated with *Carbohydrate Metabolism*

255 tended to peak in the morning. Almost half (48.0%) of the transcripts had a peak at  
256 ZT00 in L1, while the majority peaked between ZT00 and ZT04 in both I1 (53.2%) and  
257 I5 (58%) (Fig. 2E). Amongst the individual transcripts, a putative ortholog of *SUCROSE*  
258 *SYNTHASE4* (*SuSy4*) had a similar rhythmic pattern in all three organs. A putative  
259 ortholog of *SUCROSE-PHOSPHATE SYNTHASE II* (*SPSII*) was rhythmic only in L1,  
260 while a putative ortholog of a *CELL WALL INVERTASE* (*CWI*) exhibited a sharp peak  
261 at ZT04 in L1 but a very broad peak at ZT08 in I1 and I5 (Fig. S9I, M, and Q).

262 Transcripts associated with *Cell Wall Synthesis & Elongation* had a more diverse  
263 phase distribution: in L1, 55% had a peak between ZT00 and ZT04; in I1, 73.4% had a  
264 peak between ZT00 and ZT08; and in I5, 45.8% had a peak between ZT08 and ZT10  
265 and 37.8% had one at ZT00 (Fig. 2E). There was also a higher proportion of transcripts  
266 associated with *Cell Wall Synthesis & Elongation* that are expressed only in I1 and I5  
267 (Fig. S9). Transcripts associated with *Amino Acid Metabolism* peaked between ZT12  
268 and ZT14 in L1 (50%). In I1 and I5, they had two peaks: between ZT00 and ZT02  
269 (37.5% and 57.1%) and between ZT08 and ZT10 (37.5% and 42.9%) (Fig. 2B).

270 Transcripts associated with *Transporters* peaked at ZT02 (35.7%) and ZT12 (15.7%) in  
271 L1. In I1, most of the transcripts peaked 2 h earlier, at ZT00 (24.2%) and ZT10  
272 (24.2%). I5 displayed a similar pattern to I1, with 53.6% peaking between ZT00 and  
273 ZT02 and 46.4% between ZT08 and ZT10 (Fig. 2B). This tendency for L1 to have later  
274 phases than I1 and I5 can be seen in the putative ortholog *SWEET2*, which peaked at  
275 ZT02 in L1 and at ZT18-20 in I1 and I5 (Fig. S9L).

276

#### 277 *Circadian clock transcripts have similar dynamics in different sugarcane organs*

278 The differences in the rhythmic transcripts of the three organs could be explained by  
279 the presence of organ-specific circadian clocks that could generate different patterns of  
280 rhythmic transcription. For this reason, we looked at rhythms in the *Input Pathways*,  
281 *Central Oscillator*, and *Output Pathways* of the circadian clock. Most of the known *Input*  
282 *Pathways* to the circadian clock are associated with *Light Signaling*<sup>6</sup>. *Light Signaling* is  
283 underrepresented among the transcripts expressed in I5 and the rhythmic transcripts in  
284 I1 (Fig. S8). Among the red light receptor genes, *PHYTOCHROME A.1* (*PHYA.1*) was  
285 rhythmic in L1, with a peak at ZT23, while *PHYB* was not rhythmic in any organ (Fig.  
286 S10A, B). In I1 and I5, both *PHYs* had two peaks: one near dawn (ZT00-02) and  
287 another at night (ZT18-20). Among the blue light receptors, *CRYPTOCHROME1.1*  
288 (*CRY1.1*) was rhythmic in L1, peaking at ZT03. *CRY2.1* was rhythmic in I5, peaking at

289 ZT19. *ZEITLUPE* (*ZTL.1*) was rhythmic in L1 and I5, peaking at ZT01 and ZT21,  
290 respectively (Fig. S10D-F).

291 The transcripts associated with the *Central Oscillator* displayed rhythms with similar  
292 dynamics (Fig. 3). *LHY* peaked early in the morning, between ZT02 and ZT04, with  
293 overlapping dynamics in all three organs (Fig. 3a). Similarly, *TOC1* peaked around  
294 dusk, between ZT10 and ZT12, in all three organs (Fig. 3D). The normalizations used  
295 to analyze the oligoarray data do not allow the comparison of expression levels, so we  
296 used RT-qPCR to show that *LHY* varied during the day by 750× in L1 and 150× in I1  
297 and I5 (Fig. S11S). In contrast, *TOC1* differed 30× in L1 and 18× in I1 and I5 (Fig.  
298 S11B). The other PRR genes, *PRR59*, *PRR73*, and *PRR95* (referred to as *ScPRR3*,  
299 *ScPRR7*, and *ScPRR59*, respectively, in Hotta *et al.*, 2011), peaked between ZT06 and  
300 ZT10 (Fig. 3B, C, and E). *GI* peaked between ZT08 and ZT10 in all three organs (Fig.  
301 3F). Finally, *ELF3* was rhythmic only in L1, with a peak at ZT14. In the internodes,  
302 *ELF3* had a similar pattern, but it was not regarded as rhythmic due to high noise (Fig.  
303 S10C).

304 Among the possible pathways that can be recruited by the circadian clock that are  
305 considered part of the *Output Pathways* are those associated with *Chromatin*  
306 *Remodeling*, *Transcription Factors*, and *Protein Synthesis* (Fig. 4). Transcripts  
307 associated with *Chromatin Remodeling* peaked at ZT00-02 and ZT10-12 in L1 (32.5%  
308 and 36.5%, respectively). In I1 and I5, they peaked at ZT00 (40.7% and 40.8%,  
309 respectively) and ZT08-10 (33.99% and 51.2%, respectively) (Fig. 4A). Transcripts  
310 associated with *Transcription Factors* tended to peak near dawn, at ZT00-02, in all  
311 three organs (57.5% in L1, 46.4% in I1, and 50.3% in I5). A higher proportion (22.6%)  
312 of transcripts associated with *Transcription Factors* were rhythmic when compared to  
313 all rhythmic (16.6%) transcripts,  $\chi^2(6, n = 341) = 15.1, P = 0.02$  (chi-square test, Fig.  
314 4E). These transcripts also peaked similarly in all organs: 79.3% peaked in the same  
315 interval in L1 as in I1, 72.2% peaked in the same interval in L1 and I5, and 93.1% in I1  
316 and I5.

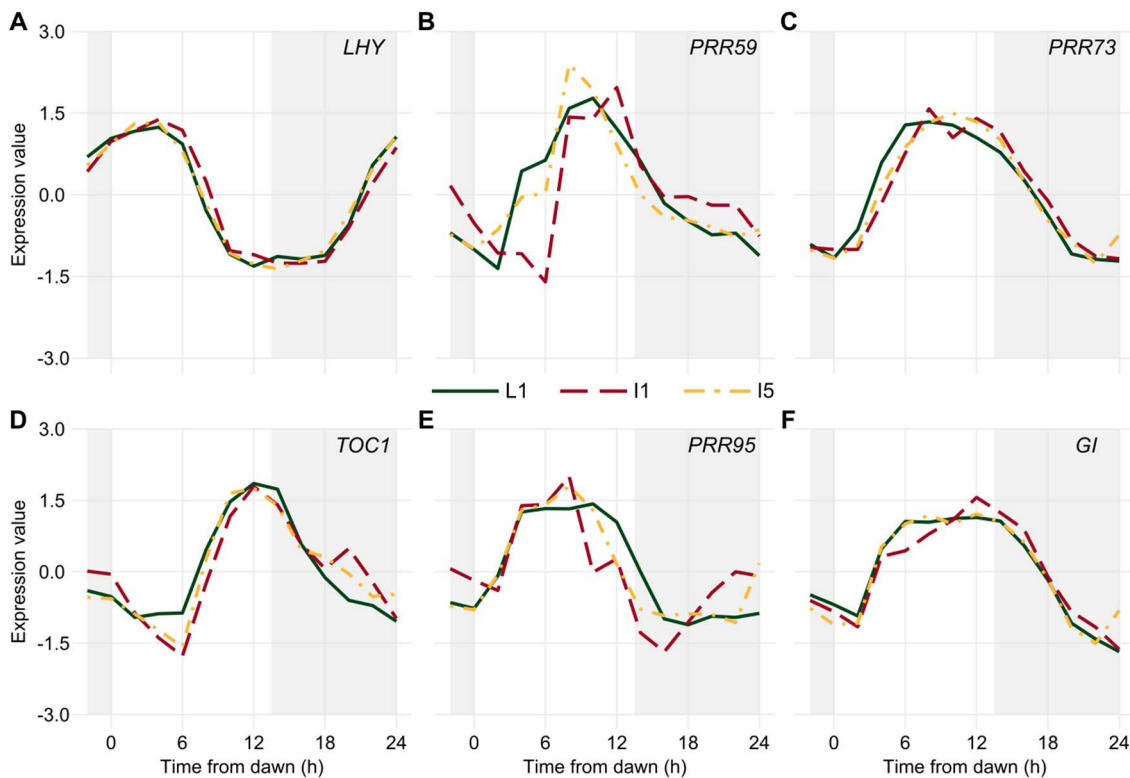

317

318 **Figure 3 – Diel rhythms of *Central Oscillator* transcripts in sugarcane organs.**

319 *LHY* (A), *PRR59* (B), *PRR73* (C), *TOC1* (D), *PRR95* (E), and *GI* (F) rhythms were  
320 measured in leaf +1 (L1, green continuous line), internodes 1 and 2 (I1, red dashed  
321 line), and internode 5 (I5, yellow dash-dotted line) of field-grown sugarcane using  
322 oligoarrays. Time series were normalized using Z-score. The light-gray boxes  
323 represent the night periods.

324

325 Transcripts associated with *Protein Synthesis* tended to peak at dusk in L1 (ZT12,  
326 49.0%), at dawn and afternoon in I1 (ZT00, 36.1%; ZT10, 32.5%), and at dawn in I5  
327 (ZT00, 61.7%) (Fig. 4C). A high proportion of transcripts associated with *Protein*  
328 *Synthesis* were expressed in all three organs (91.4%) (Fig. 4F). In contrast, more than  
329 half of the transcripts (54.6%) were rhythmic only in L1, whereas a lower frequency  
330 (41.5%) of total rhythmic transcripts were seen only in L1,  $\chi^2(6, n = 269) = 34.8, P <$   
331 0.001 (Fig. 4I).

332 Other transcripts showed a wide variety of oscillations amongst the three organs (Fig.  
333 4J-L, and S11). The putative *STRUCTURAL MAINTENANCE OF CHROMOSOMES1*  
334 (*SMC1*), associated with *Chromatin Remodeling*, peaked at ZT06 in L1 and ZT11 in I1  
335 and I5 (Fig. 4J). Two putative *JUMONJI-C (JMJC) DOMAIN-CONTAINING PROTEIN5*  
336 (*JMJD5*) genes, encoding proteins that can act as histone demethylases, were found in

337 sugarcane. *JMJD5.1* is expressed only in I1 and I5 and has a phase at ZT10 (Fig.  
338 S12A, D); *JMJD5.2* is expressed in all organs with similar rhythmic patterns (Fig.  
339 S12A). The transcription factor gene *HOMEBOX PROTEIN24 (HB24)* is rhythmic  
340 only in L1, with a peak at ZT10 (Fig. 4K). Another rhythmic gene, *40S RIBOSOMAL*  
341 *PROTEIN S15 (S15A)*, associated with *Protein Synthesis*, has a peak at ZT14 in L1  
342 and at ZT00 in I1 and I5 (Fig. 4L).

343



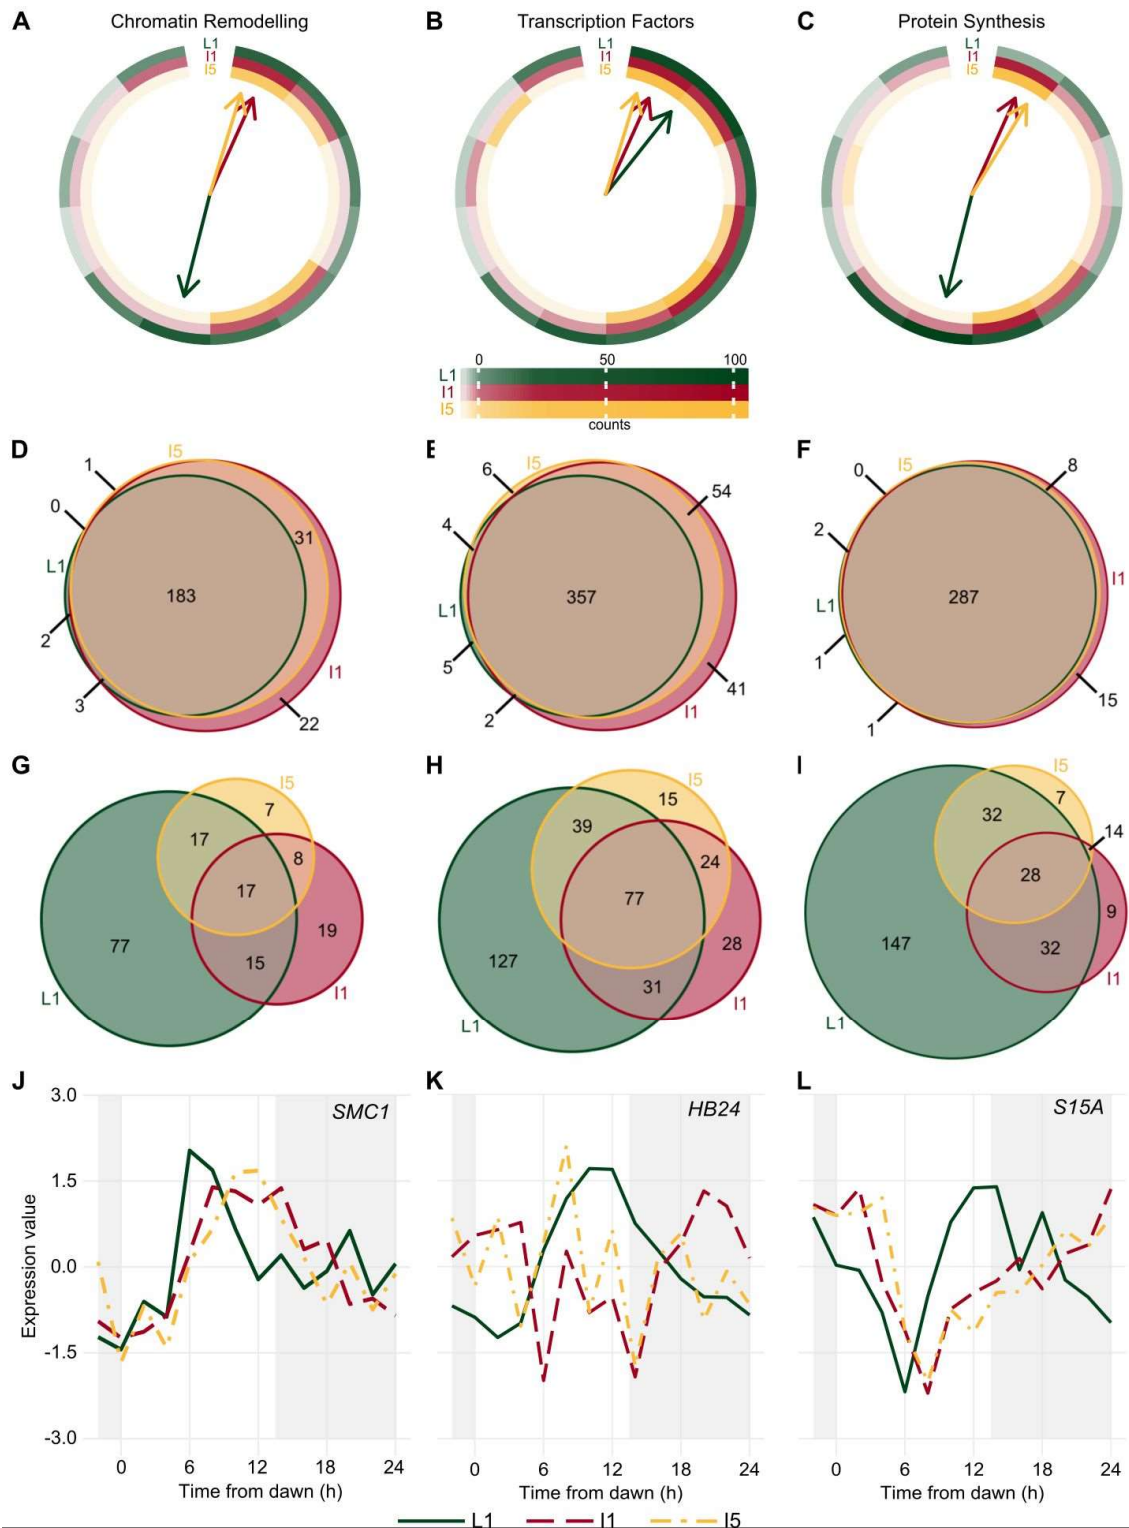

344

345 **Figure 4 – Transcripts associated with *Genetic Information Processing* have**  
 346 **different rhythms in sugarcane organs. (A-C)** Circular heatmap of the distribution of  
 347 the peak time of rhythmic transcripts related to *Chromatin Remodelling* (A),  
 348 *Transcription Factors* (B), and *Protein Synthesis* (C) in leaf +1 (L1, green), internodes 1  
 349 and 2 (I1, red), and internode 5 (I5, yellow). The colored arrows show the time at which  
 350 the most transcripts are found in each organ. (D-I) Euler diagrams of all expressed



351 transcripts (**D-F**) and rhythmic transcripts (**G-I**) in L1, I1, and I5 in field-grown  
352 sugarcane in diel conditions. (**J-L**) *SMC1* (**J**), *HB24* (**K**), and *S15A* (**L**) rhythms  
353 measured in L1 (continuous green line), I1 (red dashed line), and I5 (yellow dash-  
354 dotted line) of field-grown sugarcane using oligoarrays. Time series were normalized  
355 using Z-score. The light-gray boxes represent the night periods.

356

## 357 **Discussion**

358 Organ-specific rhythms of transcription can be found in highly productive and  
359 intensively selected commercial sugarcane. The specialization of the rhythmic  
360 transcriptome may help the plant cells to adapt to local environmental rhythms, as well  
361 as to generate rhythms that are compatible with their specialized needs. Specialized  
362 rhythms may also be essential to rhythmic processes that require organ-to-organ  
363 coordination, such as sucrose transport from the leaves to the internodes<sup>28</sup>.

364

### 365 *Rhythms in field conditions are different from those in controlled conditions*

366 Sugarcane leaves in field conditions had twice as many transcripts identified as  
367 rhythmic than plants assayed under circadian conditions. This difference is expected  
368 because some rhythms are driven by environmental oscillations, such as light and  
369 temperature. Also, some circadian-clock-driven rhythms may undergo amplitude  
370 increases due to a general increase in the amplitude of the *Central Oscillator*. In L1, the  
371 transcriptional rhythms of *LHY* vary by up to 60× in a day in circadian conditions and  
372 750× in field conditions, while those of *TOC1* vary up to 5× in a day in circadian  
373 conditions and 40× in field conditions (Hotta et al., 2013, and Fig. S11).

374 In circadian conditions, most transcripts peaked at subjective dusk (ZT12, 29.0%),  
375 which resulted in 60.5% of the transcripts peaking during subjective night. By contrast,  
376 in field conditions, most transcripts peaked near dawn (ZT00-02, 35.2%) in L1, which  
377 resulted in 80.3% of the transcripts peaking during the day. This reinforces the role of  
378 the light/dark transition as the driving force of rhythms in leaves in field conditions. A  
379 high proportion (64.1%) of the transcripts that peaked during the subjective night in  
380 circadian conditions showed phase changes that made their peak happen during the  
381 day in field conditions. This might suggest the existence of dampening mechanisms  
382 that actively decrease nocturnal peaks. A similar mechanism keeps cytoplasmic  
383 calcium concentration lower during the night under diel conditions (day/night) than

384 during the subjective night under circadian conditions<sup>29</sup>. Most of the transcripts  
385 associated with the *Central Oscillator* maintained their core phases, except *LHY*, which  
386 had a later peak (ZT01 in circadian conditions; ZT04 in field conditions). As a  
387 comparison, *LHY* is induced by light in Arabidopsis and is mostly insensitive to  
388 temperature in rice<sup>22,30</sup>. In sugarcane, alternative splicing of *LHY* correlates with  
389 environmental temperature<sup>31</sup>. The differences between the rhythmic transcriptomes in  
390 circadian conditions and field conditions highlight the importance of experiments done  
391 under field conditions to understanding how the circadian clock can affect the plant  
392 transcriptome *in natura*. For example, simulations of natural conditions in growth  
393 chambers showed that the flowering signal *FLOWERING LOCUS T (FT)* has a different  
394 phase under such conditions than it does under controlled conditions in Arabidopsis<sup>19</sup>.  
395 This discovery will require adjustments to the current flowering models to reflect events  
396 in natural conditions.

397 In recent years, the productivity gains of sugarcane crop through classical breeding has  
398 been decreasing<sup>32,33</sup>. A possible strategy to increase productivity gains is the use of  
399 molecular markers<sup>33–35</sup>. However, the association between genotype and phenotype  
400 remains a challenge, despite many attempts<sup>36,37</sup>. Several studies have identified  
401 drought-induced genes in order to identify targets for molecular breeding<sup>25,38–40</sup>.  
402 However, as most of these studies only harvest at one timepoint, it is possible that  
403 important rhythmic drought-induced genes are missed<sup>41</sup>. In addition, delays in the  
404 harvesting of plant material, or changes in phase or period of rhythmic genes, can lead  
405 to the genes to be incorrectly considered differentially expressed<sup>42</sup>. Thus, the  
406 identification of rhythmic genes in the field can both increase the identification of genes  
407 of interest and help to reduce the number of false positive, aiding the identification of  
408 targets for molecular breeding.

409

#### 410 *Rhythmic transcripts are organ-specific*

411 The transcripts in L1, I1, and I5 have very different rhythmic patterns, even though  
412 most of the expressed transcripts were found in all three organs. Rhythms in I1 and I5  
413 were more like each other than to those in L1, and only 7.4% of the transcripts  
414 expressed in all three organs showed the same rhythms. Thus, we conclude that these  
415 three organs have vastly different and specialized circadian clocks. These specialized  
416 circadian clocks could be the result of multiple organ sensitivities to environmental  
417 cues, of organ-specific *Core Oscillators*, and of organ-specific interactions of *Output*  
418 *Pathways* with environmental signals<sup>43,44</sup>.

419 In Arabidopsis, different sensitivities to environmental cues are found in the vascular  
420 phloem companion cells, which are more sensitive to photoperiodism, and the  
421 epidermis cells, which are more sensitive to temperature<sup>43</sup>. In sugarcane, most L1  
422 transcripts peak at ZT00-02 and ZT12, following dawn and dusk, while most I1 and I5  
423 transcripts peak at ZT00 and ZT08, following dawn and the daily light and temperature  
424 maxima. Thus, the circadian clocks of these organs respond differently to  
425 environmental cues such as photoperiod, light/dark transition, or temperature, as in  
426 Arabidopsis. In rice, a significant proportion of rhythmic transcripts are regulated either  
427 by the circadian clock or by temperature oscillations<sup>22</sup>. In sugarcane, rhythmic L1  
428 transcripts that were also rhythmic in circadian conditions had peaks that follow *LHY* or  
429 *TOC1* expression. On the other hand, rhythmic L1 transcripts that were not rhythmic in  
430 circadian conditions peaked at dawn and dusk. In internodes, transcripts peaked at  
431 dawn and at the light and temperature maxima. Such organ-specific sensitivity to  
432 environmental cues was previously described in the vasculature and leaf epidermis<sup>43</sup>.

433 The *Central Oscillators* of mesophyll and vasculature in Arabidopsis have similar  
434 components but with different amplitudes. *AtELF4* rhythms have an amplitude 10×  
435 higher in the vasculature, *AtPRR7* and *AtPRR9* amplitudes are 2× higher in the  
436 mesophyll, and *AtTOC1* amplitude is analogous in both tissues<sup>45</sup>. In sugarcane, *LHY*  
437 amplitude is 6× higher and *TOC1* amplitude is 2× higher in L1 compared to I1 and I5.  
438 As leaves are exposed to direct sunlight, whereas internodes are protected by layers of  
439 leaf sheaths, it is probable that sunlight is responsible for these amplitude differences.  
440 The dynamics of *LHY*, *TOC1*, and *GI* during the day were very similar in the three  
441 organs. Indeed, they were considered to be coexpressed when analyzed together (data  
442 not shown). As the three organs have different levels of exposure to the environment,  
443 the existence of a common environmental signal is unlikely. Alternatively, the  
444 oscillators of the three organs could be coupled. There is evidence in Arabidopsis of  
445 root oscillators being regulated by the oscillators of the aerial parts of the plants, either  
446 the leaves or the shoot apical meristem (SAM)<sup>46,47</sup>. As the leaves are a source signal to  
447 both internodes, it is possible that synchronizing signals are transported with sucrose  
448 and other sugars. In Arabidopsis, sugars can also act as an entrainment signal<sup>7,48</sup>.

449 Even though there is much evidence for tissue-specific circadian clocks in  
450 Arabidopsis<sup>29,45,49–51</sup>, less is known about their effect on the rhythmic regulation of  
451 transcripts. In contrast, tissue-specific rhythms have been widely studied in  
452 mammals<sup>52–55</sup>. Sampling of 12 different mouse organs over time showed that 43%  
453 (~8,500) of all transcripts had circadian rhythms in at least one organ, but only 10

454 transcripts were rhythmic in all organs<sup>54</sup>. As in sugarcane leaves, the rhythmic  
455 transcripts in mammalian organs tended to peak at dawn and dusk. In general, the only  
456 transcripts that had similar phases across all organs were the ones associated with the  
457 mammalian *Core Oscillator*<sup>54</sup>.

458 At least two regulatory pathways are required to generate tissue-specific sets of  
459 rhythmic transcripts: one that confers organ specificity and one that confers rhythmicity.  
460 These pathways can be organized in different nonexclusive ways: they could act on a  
461 gene independently, the tissue specificity pathways could regulate the rhythmicity  
462 pathways, or the rhythmicity pathways could regulate the organ specificity pathways  
463 (Fig. S13). The rhythmicity pathways can be dependent on the circadian clock, on  
464 environmental rhythms, or both. The tissue specificity pathways can include  
465 transcription factors, protein-protein interactions, alternative promoter usage, and  
466 chromatin interactions<sup>56</sup>.

467 In our datasets, transcripts that were expressed only in one organ or only in the  
468 internodes were less likely to be considered rhythmic (Fig. 2B). Thus, it is possible that  
469 rhythmic pathways regulate only a small proportion of organ-specific pathways.  
470 Transcripts associated with *Transcription Factors* were more likely to be rhythmic in all  
471 three organs, and these transcripts had a higher probability of having the same phase.  
472 However, just a few tissue-specific rhythms in transcription factors can have a sizeable  
473 cascading effect<sup>57</sup>. Tissue-specific transcription factors, even if nonrhythmic, could also  
474 change the phase of rhythmic transcripts through protein-protein interactions or by  
475 changing the promoter usage<sup>56,58</sup>. Finally, chromatin remodeling could be a significant  
476 regulatory pathway in the generation of the tissue-specific rhythmic transcriptome. In  
477 Arabidopsis, chromatin remodeling can regulate the *Central Oscillator*, but little is  
478 known about how the plant circadian clock can use chromatin remodeling to generate  
479 rhythms<sup>59–62</sup>. In sugarcane, rhythms in transcripts associated with *Chromatin*  
480 *Remodeling* were underrepresented among the rhythmic transcripts. However,  
481 chromatin remodeling tends to be regulated post-transcriptionally through histone  
482 modifications. Transcription can also be regulated at the chromatin level through  
483 topologically associating domains (TADs). TADs are domains of DNA that self-interact,  
484 generating regulatory compartments within the chromosomes<sup>63</sup>. An enhancer only  
485 interacts with a gene if they share the same TAD. In consequence, it is possible to  
486 change the enhancers that interact with a gene by changing the boundaries of a TAD,  
487 which are maintained by cohesins and CCCTC-binding factors (CTCF) in mammals<sup>63</sup>.  
488 TADs can be regulated to generate tissue-specific transcription and even rhythms<sup>64–66</sup>.  
489 In plants, TADs are maintained by cohesins, but there are still no known CTCF

490 counterparts<sup>67,68</sup>. In sugarcane, the cohesin subunit *SMC1* has different phases in  
491 leaves and internodes (Figure 4J).

492

#### 493 *The role of organ-specific rhythms in sugarcane*

494 Organ-specific rhythms may affect sugarcane productivity as they allow the different  
495 tissues to be more efficient according to their function and local environmental  
496 rhythms<sup>56</sup>. In mammals, rhythms in fibroblasts allow wound healing to occur faster  
497 during the active phase than the rest phase<sup>69</sup>. Rhythms in the liver lead to larger cell  
498 sizes and protein levels during the active phase and after feeding, making  
499 detoxification more efficient during the active and post-feeding periods<sup>70</sup>.

500 Nutrient and photoassimilate transportation inside the plant is essential for rhythmic  
501 processes and may also be part of organ-to-organ coordination and C partitioning<sup>28,71–</sup>  
502 <sup>73</sup>. In sugarcane, expressed transcripts associated with *Transporters* were  
503 overrepresented in L1 and I5, while rhythmic transcripts associated with *Transporters*  
504 were overrepresented in L1 and I1. Furthermore, transcripts associated with  
505 *Transporters* tended to peak 2 h later in L1 than in the internodes, which may indicate  
506 that the latter is the driving force of this process. The phloem and xylem are also  
507 important organs for the integration of multiple rhythmic information generated by  
508 specialized circadian clocks, such as flowering<sup>74</sup>.

509 Sugarcane have rhythms of sucrose and starch in the leaves but not in the  
510 internodes<sup>75</sup>. In this crop, sucrose is synthesized in the leaves and is degraded in the  
511 apoplast or cytosol of internodes to be re-synthesized in their vacuoles<sup>28</sup>. Organ-  
512 specific regulation of transcripts may regulate sucrose storage in sugarcane.  
513 Differences in the rhythms of transcripts associated with *Carbohydrate metabolism* may  
514 be a way to regulate C partitioning to different organs. In our experiments, transcripts  
515 associated with *Carbohydrate metabolism* peaked later in internodes than in the leaves  
516 (Figure 2E). *CWI* had a peak at ZT04 in L1, and at ZT08 in I1 and I5 (Figure S9Q). In  
517 sugarcane, higher activities of cell wall invertases are associated with higher sucrose  
518 content, possibly by enhancing sucrose unloading in the internodes<sup>28,76–78</sup>. *SPSII*, one  
519 of the enzymes that synthesize sucrose, was only rhythmic in L1, with a morning peak  
520 (Figure S9M). Interestingly, two rhythmic *SuSy* had the same dynamics in all organs  
521 (Figure S9I) but the other four were only expressed in the internodes. Sucrose  
522 synthases can function either degrading or synthesizing sucrose. In sugarcane, *SuSys*

523 mainly work in the degradative direction, and their pattern of expression are associated  
524 with the regulation of sucrose uptake in the internodes<sup>28,79,80</sup>.

525

## 526 **Conclusions**

527 The vast differences found in the rhythmic transcriptomes of different plant organs  
528 provide important clues to understanding the way that tissue-specific circadian clocks  
529 are generated and their impact on plant physiology. However, little is still known about  
530 the molecular mechanisms that control this specialization. The combination of organ- or  
531 tissue-specific studies with the observation of rhythms in the field, where conditions are  
532 fluctuating and variable as is normal in natural environments, is essential to  
533 understanding the nuances of how the plant circadian clock increases the fitness of  
534 plants and, in turn, crop productivity.

535

## 536 **Materials and Methods**

537

### 538 *Plant growth and harvesting*

539 Commercial sugarcane (*Saccharum* hybrid SP80-3280) was planted in a field in  
540 Araras, Brazil (22°18'41.0"S, 47°23'05.0"W, at an altitude of 611 m), in April 2012  
541 (autumn) (Fig. S1). The soil on the site was a Typic Eutroferic Red Latosol. Plants  
542 were harvested 9 months later, in January 2013 (summer), after an unusually dry  
543 winter and spring. The time course experiment started 2 h before dawn and continued  
544 every 2 h until the next dawn, generating time series with 14 time points in total. Dawn  
545 was at 5:45, and dusk was at 19:00 (13.25 h light/10.75 h dark) (Fig. S1). At each time  
546 point, leaf +1 (the first leaf from the top with clearly visible dewlap), internodes 1 and 2,  
547 and internode 5 of nine individuals were harvested (Fig. S2), frozen in liquid N<sub>2</sub>, and  
548 stored in three pools of three individuals each. Two pools were used as biological  
549 replicates for oligoarrays, and one pool was used for validation using the reverse-  
550 transcription quantitative PCR (RT-qPCR).

551

### 552 *Oligoarray hybridizations*



553 All frozen samples were pulverized in dry ice using a coffee grinder (Model DCG-20,  
554 Cuisinart, China). One hundred milligrams of each pulverized sample was used for  
555 extraction of total RNA using Trizol (Life Technologies), following the supplier's  
556 instructions. The RNA was treated with 2 U DNase I (Life Technologies) for 30 min at  
557 37°C and cleaned using the RNeasy Plant Mini kit (Qiagen). The quality and quantity of  
558 RNA were assayed using an Agilent RNA 6000 Nano Kit Bioanalyzer chip (Agilent  
559 Technologies). Sample labeling was done following the Low Input Quick Amp Labelling  
560 protocol of the Two-Color Microarray-Based Gene Expression Analysis system (Agilent  
561 Technologies). Hybridizations were done using a custom 4×44 k oligoarray (Agilent  
562 Technologies) that was previously described<sup>15,25</sup>. Two hybridizations were done for  
563 each time point against an equimolar pool of all samples of each organ. Each duplicate  
564 was prepared independently using dye swaps. Data were extracted using the Feature  
565 Extraction software (Agilent Technologies) (Figure S3A). Background correction was  
566 applied to each dataset. A nonlinear LOWESS normalization was also applied to the  
567 datasets to minimize variations due to experimental manipulation. Signals that were  
568 distinguishable from the local background signal were taken as an indication that the  
569 corresponding transcript was expressed. We have validated 10 transcripts (30 time  
570 series) using RT-qPCR (Figures S4 and S5). Among the time series identified as  
571 rhythmic (n = 23), 91% were also rhythmic using data from RT-qPCR (Table S2), and  
572 77% were considered correlated using Spearman's rank correlation coefficient. Among  
573 the time series identified as not rhythmic (n = 7), 86% were also not rhythmic using  
574 data from RT-qPCR, and 36.7% were considered correlated using Spearman's rank  
575 correlation coefficient. The GenBank ID and Sugarcane Assembled Sequences (SAS)  
576 numbers for sugarcane genes are listed in Table S1. The complete dataset can be  
577 found at the Gene Expression Omnibus public database under the accession number  
578 GSE129543.

579

### 580 *Data analysis*

581 For the purposes of further analysis, only transcripts that were found to be expressed in  
582 more than 7 of the 14 time points were considered to be expressed. All of the  
583 expressed transcripts time series were grouped in coexpressed modules using the R  
584 package weighted correlation network analysis (WGCNA) to identify rhythmic  
585 transcripts<sup>26</sup> (Figure S3B). Network adjacency was calculated using a soft thresholding  
586 power of 18 for all organs. Modules that had a dissimilarity value of  $\leq 0.25$  were  
587 merged. Final modules were generated using a 0.175 adjacency threshold. As



588 WGCNA groups together time series that have a positive or a negative correlation, we  
589 normalized each time series using a Z-score, separated these time series into two new  
590 modules, and generated a typical time series for each module by finding the median of  
591 all time series. Then, each representative time series was classified as rhythmic or  
592 non-rhythmic using JTK-CYCLE<sup>27</sup>. Modules that had an adjusted *P*-value of < 0.75  
593 were considered rhythmic. Finally, we filtered out noisy time series, defined as those  
594 that had a Spearman's rank correlation coefficient of < 0.3 when compared against the  
595 representative time series. Phase was assigned using the phase estimated by JTK-  
596 CYCLE corrected against a dendrogram with the representative time series of all  
597 modules of all organs. Modules that clustered together in the dendrogram were  
598 considered to have the same phase. The phase of a time series is defined as the time  
599 between dawn and the peak of the time course. Euler diagrams were done using the R  
600 package *eulerr*. Chi-squared ( $\chi^2$ ) tests were used to compare Euler diagrams.  
601 Heatmaps were created using the R packages *circlize*<sup>81</sup> and *ComplexHeatmap*<sup>82</sup>. To  
602 evaluate if a group of transcripts were under- or overrepresented, we used a  
603 hypergeometric test (*phyper* function in R). With this test, a *P*-value < 0.05 suggests  
604 that the analyzed group is overrepresented in the dataset, while a *P*-value > 0.95  
605 suggests that the analyzed group is underrepresented in the dataset. Code to fully  
606 reproduce our analysis is available on GitHub  
607 ([https://github.com/LabHotta/sugarcane\\_field\\_rhythms](https://github.com/LabHotta/sugarcane_field_rhythms)) and archived on Zenodo  
608 (<http://doi.org/10.5281/zenodo.2636813>).

609

### 610 *RT-qPCR analysis*

611

612 As described for the oligoarray hybridizations, 100 mg of the pulverized frozen samples  
613 for all three organs was used for total RNA extractions following the same Trizol (Life  
614 Technologies) protocol and then were treated with DNase I (Life Technologies) and  
615 cleansed using the RNeasy Plant Mini Kit (Qiagen). RNA quality and concentration of  
616 each sample were checked using an Agilent RNA 6000 Nano Kit Bioanalyzer chip  
617 (Agilent Technologies). Five micrograms of total purified RNA was enough for the  
618 reverse transcription reactions using the SuperScript III First-Strand Synthesis System  
619 for RT-PCR (Life Technologies). The RT-qPCR reactions for all samples were done  
620 using Power SYBR Green PCR Master Mix (Applied Biosystems), 10× diluted cDNA,  
621 and specific primers described by Hotta et al. (2013) (Figure S11). Reactions were  
622 placed in 96-well plates and read with the Fast 7500/7500 Real-Time PCR System

623 (Applied Biosystems). Data analysis was performed using the Fast 7500/7500 Real-  
624 Time PCR System built-in software (Applied Biosystems).

625

## 626 **Figure Legends**

627

628 **Figure 1 – Different organs have specific sets of rhythmic transcripts in**  
629 **sugarcane. (A)** The numbers of expressed and rhythmic transcripts detected in leaf +1  
630 (L1), internodes 1 and 2 (I1), and internode 5 (I5) in field-grown (diel) conditions, and in  
631 leaf +1 in circadian conditions published in Hotta et al. (2013)<sup>15</sup>. **(B, C)** Euler diagrams  
632 of expressed transcripts **(B)** and rhythmic transcripts **(C)** in L1 in sugarcane in diel  
633 (green) and circadian (gray) conditions. **(D)** Number of expressed transcripts, rhythmic  
634 transcripts, and rhythmic transcripts with the same phase that were found specifically in  
635 L1, I1, or I5; in both L1 and I1 (L1I1, purple); in both L1 and I5 (L1I5, light green); in  
636 both I1 and I5 (I1I5, orange); and in all three organs (L1I1I5, blue). In the second bar,  
637 the gray area corresponds to rhythmic transcripts that are expressed in only one or two  
638 organs. In the third bar, the gray area corresponds to rhythmic transcripts in only two  
639 organs that have the same phase. The gray dashed lines show the associations among  
640 bars. **(E, F)** Euler diagram of expressed and rhythmic transcripts in L1, I1, and I5 in  
641 field-grown sugarcane in diel conditions.

642

643 **Figure 2 – Transcripts have unique phases in different sugarcane organs. (A)**  
644 Circular heatmap of the rhythmic transcript peak time (ZT0 = 0 h after dawn)  
645 distribution in leaf +1 (L1), internodes 1 and 2 (I1), and internode 5 (I5). The colored  
646 arrows show the times at which the most transcripts are found in each organ. The  
647 times of dawn, dusk, *LHY* transcription peak, maximum light intensity, and maximum  
648 temperatures are indicated by black arcs. **(B)** Proportions of transcripts that were  
649 rhythmic in L1, I1, and I5 among all expressed transcripts in each organ (All), among  
650 the transcripts expressed only in one organ (L1 only, I1 only, or I5 only), among the  
651 transcripts expressed in two organs (L1I1, L1I5, or I1I5), and among transcripts  
652 expressed in all three organs (L1I1I5). **(C)** Distribution of rhythmic transcript peak time  
653 in transcripts that were rhythmic in L1 but not in circadian conditions ( $\alpha$  in Fig. 1C) and  
654 rhythmic transcripts in transcripts that were rhythmic in L1 and circadian conditions ( $\beta$ ).  
655 **(D)** Heatmap of functional categories that are overrepresented (shades of blue) or  
656 underrepresented (shades of red) among the expressed and rhythmic transcripts of L1,  
657 I1, and I5. The *P*-value was calculated using a hypergeometric test. **(E)** Circular  
658 heatmap with the distribution of the peak times of rhythmic transcripts associated with

659 the pathways *Carbohydrate Metabolism, Cell Wall Synthesis & Elongation, Amino Acid*  
660 *Metabolism, and Transporters*.

661

662 **Figure 3 – Diel rhythms of *Central Oscillator* transcripts in sugarcane organs.**

663 *LHY (A), PRR59 (B), PRR73 (C), TOC1 (D), PRR95 (E), and GI (F)* rhythms were  
664 measured in leaf +1 (L1, green continuous line), internodes 1 and 2 (I1, red dashed  
665 line), and internode 5 (I5, yellow dash-dotted line) of field-grown sugarcane using  
666 oligoarrays. Time series were normalized using Z-score. The light-gray boxes  
667 represent the night periods.

668

669 **Figure 4 – Transcripts associated with *Genetic Information Processing* have**

670 **different rhythms in sugarcane organs. (A-C)** Circular heatmap of the distribution of

671 the peak time of rhythmic transcripts related to *Chromatin Remodeling (A),*

672 *Transcription Factors (B),* and *Protein Synthesis (C)* in leaf +1 (L1, green), internodes 1

673 and 2 (I1, red), and internode 5 (I5, yellow). The colored arrows show the time at which

674 the most transcripts are found in each organ. **(D-I)** Euler diagrams of all expressed

675 transcripts **(D-F)** and rhythmic transcripts **(G-I)** in L1, I1, and I5 in field-grown

676 sugarcane in diel conditions. **(J-L)** *SMC1 (J), HB24 (K), and S15A (L)* rhythms

677 measured in L1 (continuous green line), I1 (red dashed line), and I5 (yellow dash-

678 dotted line) of field-grown sugarcane using oligoarrays. Time series were normalized

679 using Z-score. The light-gray boxes represent the night periods.

680

## 681 **Literature Cited**

682 1. Green, R. M., Tingay, S., Wang, Z.-Y. & Tobin, E. M. Circadian rhythms confer a higher level

683 of fitness to *Arabidopsis* plants. *Plant Physiol.* **129**, 576–584 (2002).

684 2. Dodd, A. N. *et al.* Plant circadian clocks increase photosynthesis, growth, survival, and

685 competitive advantage. *Science (New York, N.Y.)* **309**, 630–3 (2005).

686 3. Muller, N. A. *et al.* Domestication selected for deceleration of the circadian clock in

687 cultivated tomato. *Nat Genet* **48**, 89–93 (2016).

- 688 4. Turner, A., Beales, J., Faure, S., Dunford, R. P. & Laurie, D. A. The pseudo-response  
689 regulator Ppd-H1 provides adaptation to photoperiod in barley. *Science* **310**, 1031–1034  
690 (2005).
- 691 5. Gawroński, P. *et al.* A distorted circadian clock causes early flowering and temperature-  
692 dependent variation in spike development in the Eps-3Am mutant of einkorn wheat.  
693 *Genetics* **196**, 1253–1261 (2014).
- 694 6. Oakenfull, R. J. & Davis, S. J. Shining a light on the Arabidopsis circadian clock. *Plant Cell*  
695 *Environ.* **40**, 2571–2585 (2017).
- 696 7. Frank, A. *et al.* Circadian entrainment in Arabidopsis by the sugar-responsive transcription  
697 factor bZIP63. *Current Biology* **28**, 2597–2606.e6 (2018).
- 698 8. Webb, A. A. R., Seki, M., Satake, A. & Caldana, C. Continuous dynamic adjustment of the  
699 plant circadian oscillator. *Nature Communications* **10**, 550 (2019).
- 700 9. Hsu, P. Y., Devisetty, U. K. & Harmer, S. L. Accurate timekeeping is controlled by a cycling  
701 activator in Arabidopsis. *Elife* **2**, e00473 (2013).
- 702 10. Millar, A. J. The intracellular dynamics of circadian clocks reach for the light of ecology and  
703 evolution. *Annu Rev Plant Biol* **67**, 595–618 (2016).
- 704 11. Henriques, R., Papdi, C., Ahmad, Z. & Bögre, L. Circadian regulation of plant growth. in  
705 *Annual Plant Reviews online* 1–29 (American Cancer Society, 2018).  
706 doi:10.1002/9781119312994.apr0655.
- 707 12. Hotta, C. T. *et al.* Modulation of environmental responses of plants by circadian clocks.  
708 *Plant, cell & environment* **30**, 333–49 (2007).
- 709 13. Calixto, C. P. G., Waugh, R. & Brown, J. W. S. Evolutionary relationships among barley and  
710 Arabidopsis core circadian clock and clock-associated genes. *J. Mol. Evol.* **80**, 108–119  
711 (2015).

- 712 14. Kusakina, J. *et al.* Barley Hv CIRCADIAN CLOCK ASSOCIATED 1 and Hv PHOTOPERIOD H1  
713 are circadian regulators that can affect circadian rhythms in Arabidopsis. *PLoS ONE* **10**,  
714 e0127449 (2015).
- 715 15. Hotta, C. T., Nishiyama, M. Y. & Souza, G. M. Circadian rhythms of sense and antisense  
716 transcription in sugarcane, a highly polyploid crop. *PloS one* **8**, e71847 (2013).
- 717 16. Glassop, D. & Rae, A. L. Expression of sugarcane genes associated with perception of  
718 photoperiod and floral induction reveals cycling over a 24-hour period. *Functional Plant*  
719 *Biol.* **46**, 314–327 (2019).
- 720 17. Shalit-Kaneh, A., Kumimoto, R. W., Filkov, V. & Harmer, S. L. Multiple feedback loops of the  
721 Arabidopsis circadian clock provide rhythmic robustness across environmental conditions.  
722 *Proc. Natl. Acad. Sci. U.S.A.* **115**, 7147–7152 (2018).
- 723 18. Annunziata, M. G. *et al.* Response of Arabidopsis primary metabolism and circadian clock  
724 to low night temperature in a natural light environment. *J. Exp. Bot.* **69**, 4881–4895 (2018).
- 725 19. Song, Y. H. *et al.* Molecular basis of flowering under natural long-day conditions in  
726 Arabidopsis. *Nat Plants* **4**, 824–835 (2018).
- 727 20. Rubin, M. J. *et al.* Circadian rhythms vary over the growing season and correlate with  
728 fitness components. *Mol. Ecol.* **26**, 5528–5540 (2017).
- 729 21. Izawa, T. *et al.* Os-GIGANTEA confers robust diurnal rhythms on the global transcriptome  
730 of rice in the field. *Plant Cell* **23**, 1741–1755 (2011).
- 731 22. Nagano, A. J. *et al.* Deciphering and prediction of transcriptome dynamics under  
732 fluctuating field conditions. *Cell* **151**, 1358–1369 (2012).
- 733 23. Matsuzaki, J., Kawahara, Y. & Izawa, T. Punctual transcriptional regulation by the rice  
734 circadian clock under fluctuating field conditions. *Plant Cell* **27**, 633–648 (2015).
- 735 24. Ming, R. *et al.* The pineapple genome and the evolution of CAM photosynthesis. *Nat.*  
736 *Genet.* **47**, 1435–1442 (2015).

- 737 25. Lembke, C. G., Nishiyama, M. Y., Sato, P. M., de Andrade, R. F. & Souza, G. M.  
738 Identification of sense and antisense transcripts regulated by drought in sugarcane. *Plant*  
739 *Mol Biol* **79**, 461–477 (2012).
- 740 26. Langfelder, P. & Horvath, S. WGCNA: an R package for weighted correlation network  
741 analysis. *BMC Bioinformatics* **9**, 559 (2008).
- 742 27. Hughes, M. E., Hogenesch, J. B. & Kornacker, K. JTK\_CYCLE: an efficient nonparametric  
743 algorithm for detecting rhythmic components in genome-scale data sets. *J Biol Rhythms*  
744 **25**, 372–380 (2010).
- 745 28. Wang, J., Nayak, S., Koch, K. & Ming, R. Carbon partitioning in sugarcane (*Saccharum*  
746 species). *Front. Plant Sci.* **4**, (2013).
- 747 29. Xu, X. *et al.* Distinct light and clock modulation of cytosolic free Ca<sup>2+</sup> oscillations and  
748 rhythmic CHLOROPHYLL A/B BINDING PROTEIN2 promoter activity in Arabidopsis. *The*  
749 *Plant cell* **19**, 3474–90 (2007).
- 750 30. Kim, J.-Y., Song, H.-R., Taylor, B. L. & Carré, I. A. Light-regulated translation mediates gated  
751 induction of the Arabidopsis clock protein LHY. *The EMBO Journal* **22**, 935–944 (2003).
- 752 31. Dantas, L. L. B. *et al.* Alternative Splicing of Circadian Clock Genes Correlates With  
753 Temperature in Field-Grown Sugarcane. *Front. Plant Sci.* **10**, (2019).
- 754 32. Waclawovsky, A. J., Sato, P. M., Lembke, C. G., Moore, P. H. & Souza, G. M. Sugarcane for  
755 bioenergy production: an assessment of yield and regulation of sucrose content. *Plant*  
756 *Biotechnology Journal* **8**, 263–276 (2010).
- 757 33. Barreto, F. Z. *et al.* A genome-wide association study identified loci for yield component  
758 traits in sugarcane (*Saccharum* spp.). *PLoS One* **14**, (2019).
- 759 34. Dal-Bianco, M. *et al.* Sugarcane improvement: how far can we go? *Current opinion in*  
760 *biotechnology* **23**, 265–70 (2012).
- 761 35. Hotta, C. T. *et al.* The Biotechnology Roadmap for Sugarcane Improvement. *Tropical Plant*  
762 *Biol.* **3**, 75–87 (2010).



- 763 36. Margarido, G. R. A., Pastina, M. M., Souza, A. P. & Garcia, A. A. F. Multi-trait multi-  
764 environment quantitative trait loci mapping for a sugarcane commercial cross provides  
765 insights on the inheritance of important traits. *Mol Breed* **35**, (2015).
- 766 37. Balsalobre, T. W. A. *et al.* GBS-based single dosage markers for linkage and QTL mapping  
767 allow gene mining for yield-related traits in sugarcane. *BMC Genomics* **18**, (2017).
- 768 38. Vantini, J. S. *et al.* Differential gene expression in drought-tolerant sugarcane roots. *Genet.*  
769 *Mol. Res.* **14**, 7196–7207 (2015).
- 770 39. Gentile, A., Dias, L. I., Mattos, R. S., Ferreira, T. H. & Menossi, M. MicroRNAs and drought  
771 responses in sugarcane. *Front Plant Sci* **6**, 58 (2015).
- 772 40. Li, C. *et al.* Differential expression profiles and pathways of genes in sugarcane leaf at  
773 elongation stage in response to drought stress. *Sci Rep* **6**, 25698 (2016).
- 774 41. Dubois, M., Claeys, H., Broeck, L. V. den & Inzé, D. Time of day determines Arabidopsis  
775 transcriptome and growth dynamics under mild drought. *Plant, Cell & Environment* **40**,  
776 180–189 (2017).
- 777 42. Hsu, P. Y. & Harmer, S. L. Circadian Phase Has Profound Effects on Differential Expression  
778 Analysis. *PLOS ONE* **7**, e49853 (2012).
- 779 43. Shimizu, H. *et al.* Decentralized circadian clocks process thermal and photoperiodic cues in  
780 specific tissues. *Nat Plants* **1**, 15163 (2015).
- 781 44. Bordage, S., Sullivan, S., Laird, J., Millar, A. J. & Nimmo, H. G. Organ specificity in the plant  
782 circadian system is explained by different light inputs to the shoot and root clocks. *New*  
783 *Phytol.* **212**, 136–149 (2016).
- 784 45. Endo, M., Shimizu, H., Nohales, M. A., Araki, T. & Kay, S. A. Tissue-specific clocks in  
785 Arabidopsis show asymmetric coupling. *Nature* **515**, 419–22 (2014).
- 786 46. James, A. B. *et al.* The circadian clock in Arabidopsis roots is a simplified slave version of  
787 the clock in shoots. *Science (New York, N.Y.)* **322**, 1832–5 (2008).

- 788 47. Takahashi, N., Hirata, Y., Aihara, K. & Mas, P. A hierarchical multi-oscillator network  
789 orchestrates the Arabidopsis circadian system. *Cell* **163**, 148–159 (2015).
- 790 48. Haydon, M. J., Mielczarek, O., Robertson, F. C., Hubbard, K. E. & Webb, A. A.  
791 Photosynthetic entrainment of the Arabidopsis thaliana circadian clock. *Nature* **502**, 689–  
792 92 (2013).
- 793 49. Para, A. *et al.* PRR3 Is a vascular regulator of TOC1 stability in the Arabidopsis circadian  
794 clock. *Plant Cell* **19**, 3462–3473 (2007).
- 795 50. Kim, S.-G., Yon, F., Gaquerel, E., Gulati, J. & Baldwin, I. T. Tissue specific diurnal rhythms of  
796 metabolites and their regulation during herbivore attack in a native tobacco, *Nicotiana*  
797 *attenuata*. *PLoS ONE* **6**, e26214 (2011).
- 798 51. Endo, M. Tissue-specific circadian clocks in plants. *Curr. Opin. Plant Biol.* **29**, 44–49 (2015).
- 799 52. Storch, K.-F. *et al.* Extensive and divergent circadian gene expression in liver and heart.  
800 *Nature* **417**, 78–83 (2002).
- 801 53. Panda, S. *et al.* Coordinated transcription of key pathways in the mouse by the circadian  
802 clock. *Cell* **109**, 307–320 (2002).
- 803 54. Zhang, R., Lahens, N. F., Ballance, H. I., Hughes, M. E. & Hogenesch, J. B. A circadian gene  
804 expression atlas in mammals: implications for biology and medicine. *Proc. Natl. Acad. Sci.*  
805 *U.S.A.* **111**, 16219–16224 (2014).
- 806 55. Ruben, M. D. *et al.* A database of tissue-specific rhythmically expressed human genes has  
807 potential applications in circadian medicine. *Sci Transl Med* **10**, (2018).
- 808 56. Yeung, J. & Naef, F. Rhythms of the genome: circadian dynamics from chromatin topology,  
809 tissue-specific gene expression, to behavior. *Trends in Genetics* **34**, 915–926 (2018).
- 810 57. Yeung, J. *et al.* Transcription factor activity rhythms and tissue-specific chromatin  
811 interactions explain circadian gene expression across organs. *Genome Res.* **28**, 182–191  
812 (2018).

- 813 58. Smieszek, S. P., Yang, H., Paccanaro, A. & Devlin, P. F. Progressive promoter element  
814 combinations classify conserved orthogonal plant circadian gene expression modules. *J R*  
815 *Soc Interface* **11**, (2014).
- 816 59. Lu, S. X. *et al.* The Jumonji C Domain-Containing Protein JMJ30 regulates period length in  
817 the Arabidopsis circadian clock. *Plant Physiology* **155**, 906–915 (2011).
- 818 60. Malapeira, J., Khaitova, L. C. & Mas, P. Ordered changes in histone modifications at the  
819 core of the Arabidopsis circadian clock. *Proceedings of the National Academy of Sciences*  
820 *of the United States of America* **109**, 21540–5 (2012).
- 821 61. Lee, H. G., Lee, K., Jang, K. & Seo, P. J. Circadian expression profiles of chromatin  
822 remodeling factor genes in Arabidopsis. *J. Plant Res.* **128**, 187–199 (2015).
- 823 62. Yang, P., Wang, J., Huang, F.-Y., Yang, S. & Wu, K. The plant circadian clock and chromatin  
824 modifications. *Genes (Basel)* **9**, (2018).
- 825 63. Long, H. K., Prescott, S. L. & Wysocka, J. Ever-changing landscapes: transcriptional  
826 enhancers in development and evolution. *Cell* **167**, 1170–1187 (2016).
- 827 64. Aguilar-Arnal, L. *et al.* Cycles in spatial and temporal chromosomal organization driven by  
828 the circadian clock. *Nature Structural & Molecular Biology* **20**, 1206–1213 (2013).
- 829 65. Kim, Y. H. *et al.* Rev-erba dynamically modulates chromatin looping to control circadian  
830 gene transcription. *Science* **359**, 1274–1277 (2018).
- 831 66. Mermet, J. *et al.* Clock-dependent chromatin topology modulates circadian transcription  
832 and behavior. *Genes Dev.* **32**, 347–358 (2018).
- 833 67. Schubert, V., Lermontova, I. & Schubert, I. The Arabidopsis CAP-D proteins are required for  
834 correct chromatin organisation, growth and fertility. *Chromosoma* **122**, 517–533 (2013).
- 835 68. Liu, C., Cheng, Y.-J., Wang, J.-W. & Weigel, D. Prominent topologically associated domains  
836 differentiate global chromatin packing in rice from Arabidopsis. *Nat Plants* **3**, 742–748  
837 (2017).

- 838 69. Hoyle, N. P. *et al.* Circadian actin dynamics drive rhythmic fibroblast mobilization during  
839 wound healing. *Sci Transl Med* **9**, (2017).
- 840 70. Sinturel, F. *et al.* Diurnal oscillations in liver Mass and cell size accompany ribosome  
841 assembly cycles. *Cell* **169**, 651-663.e14 (2017).
- 842 71. Xu, G. Sensing and transport of nutrients in plants. *Semin. Cell Dev. Biol.* **74**, 78–79 (2018).
- 843 72. López-Salmerón, V., Cho, H., Tonn, N. & Greb, T. The phloem as a mediator of plant growth  
844 plasticity. *Curr. Biol.* **29**, R173–R181 (2019).
- 845 73. Osorio, S., Ruan, Y.-L. & Fernie, A. R. An update on source-to-sink carbon partitioning in  
846 tomato. *Front. Plant Sci.* **5**, (2014).
- 847 74. Inoue, K., Araki, T. & Endo, M. Oscillator networks with tissue-specific circadian clocks in  
848 plants. *Seminars in Cell & Developmental Biology* **83**, 78–85 (2018).
- 849 75. Souza, A. P. D., Grandis, A., Arenque-Musa, B. C. & Buckeridge, M. S. Diurnal variation in  
850 gas exchange and nonstructural carbohydrates throughout sugarcane development.  
851 *Functional Plant Biol.* **45**, 865–876 (2018).
- 852 76. Chandra, A., Jain, R. & Solomon, S. Complexities of invertases controlling sucrose  
853 accumulation and retention in sugarcane. *Current Science* **102**, 857–866 (2012).
- 854 77. Lingle, S. E. Evidence for the Uptake of Sucrose Intact into Sugarcane Internodes. *Plant*  
855 *Physiol* **90**, 6–8 (1989).
- 856 78. Moore, P. H. Temporal and Spatial Regulation of Sucrose Accumulation in the Sugarcane  
857 Stem. *Functional Plant Biol.* **22**, 661–679 (1995).
- 858 79. Buczynski, S. R., Thom, M., Chourey, P. & Maretzki, A. Tissue Distribution and  
859 Characterization of Sucrose Synthase Isozymes in Sugarcane. *Journal of Plant Physiology*  
860 **142**, 641–646 (1993).
- 861 80. Thirugnanasambandam, P. P. *et al.* Analysis of the diversity and tissue specificity of  
862 sucrose synthase genes in the long read transcriptome of sugarcane. *BMC Plant Biology*  
863 **19**, 160 (2019).

- 864 81. Gu, Z., Gu, L., Eils, R., Schlesner, M. & Brors, B. circlize Implements and enhances circular  
865 visualization in R. *Bioinformatics* **30**, 2811–2812 (2014).
- 866 82. Gu, Z., Eils, R. & Schlesner, M. Complex heatmaps reveal patterns and correlations in  
867 multidimensional genomic data. *Bioinformatics* **32**, 2847–2849 (2016).
- 868

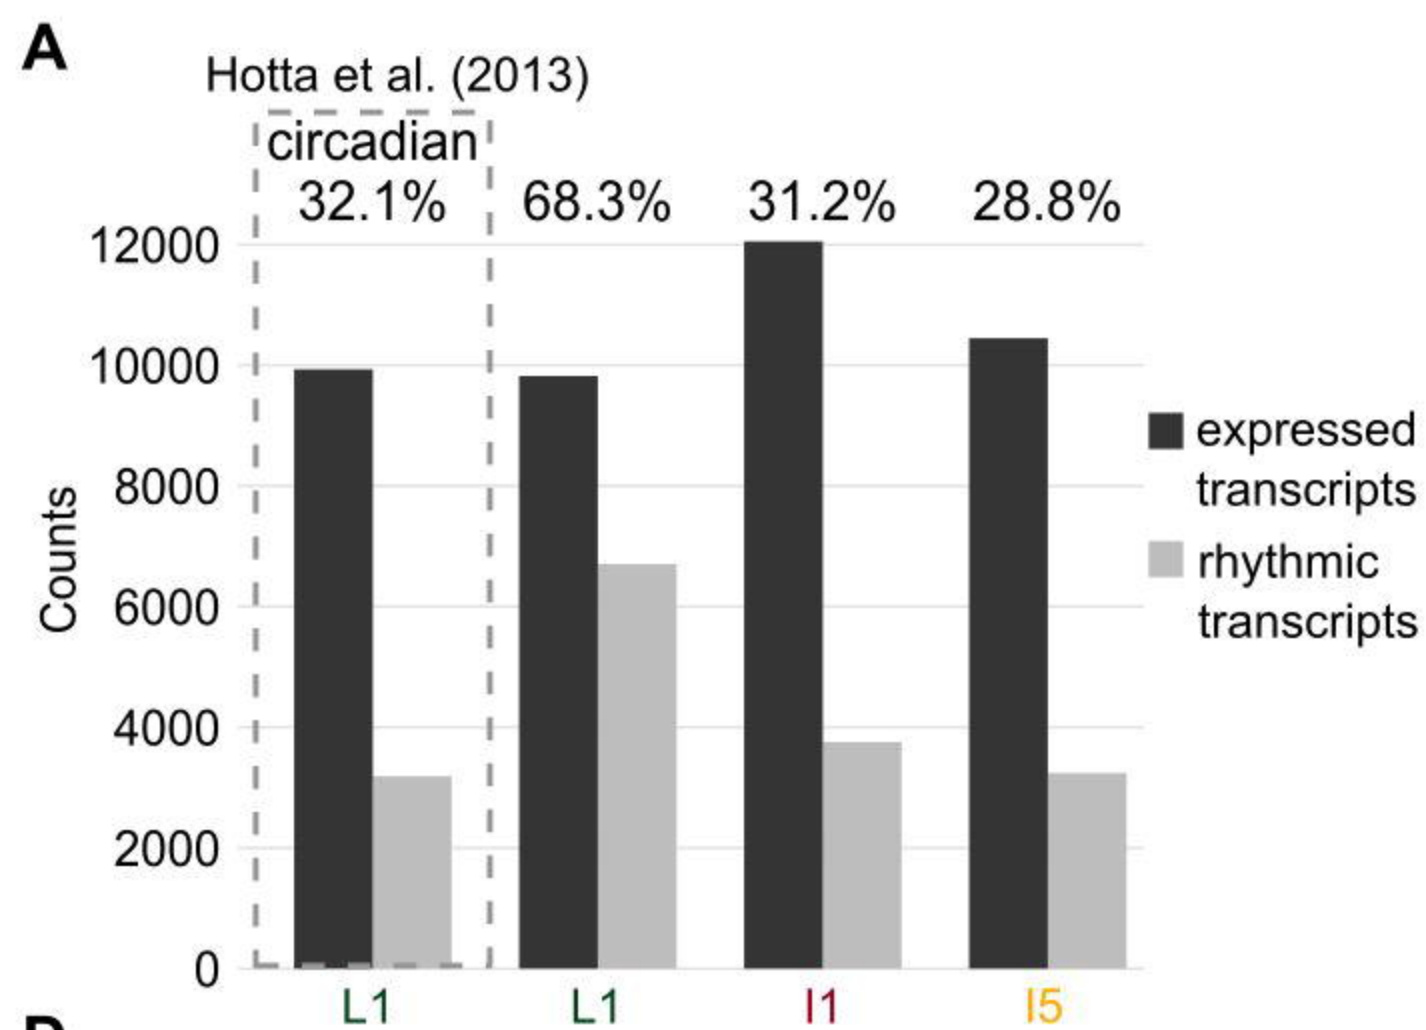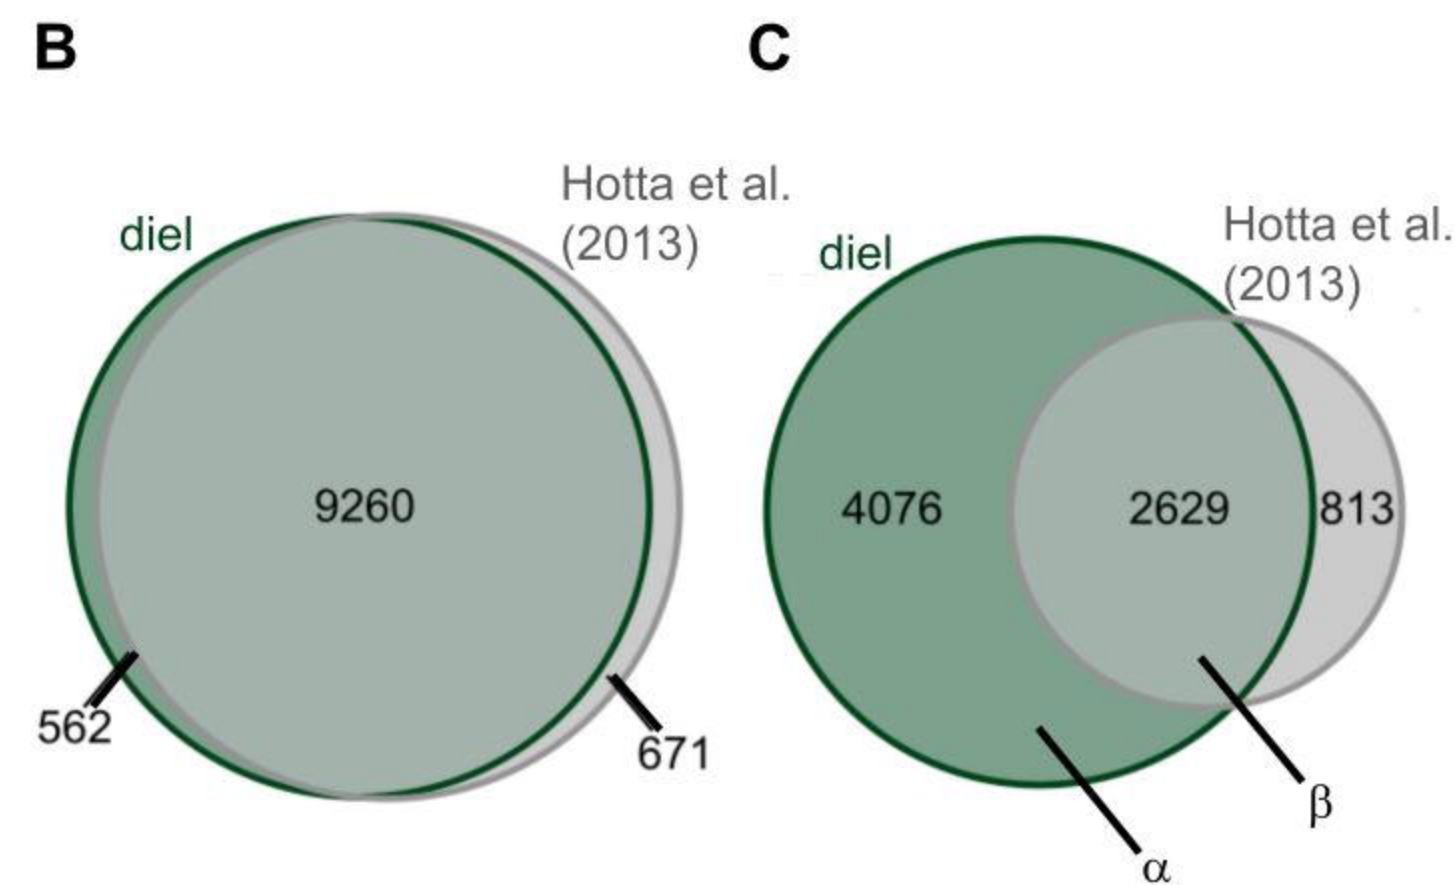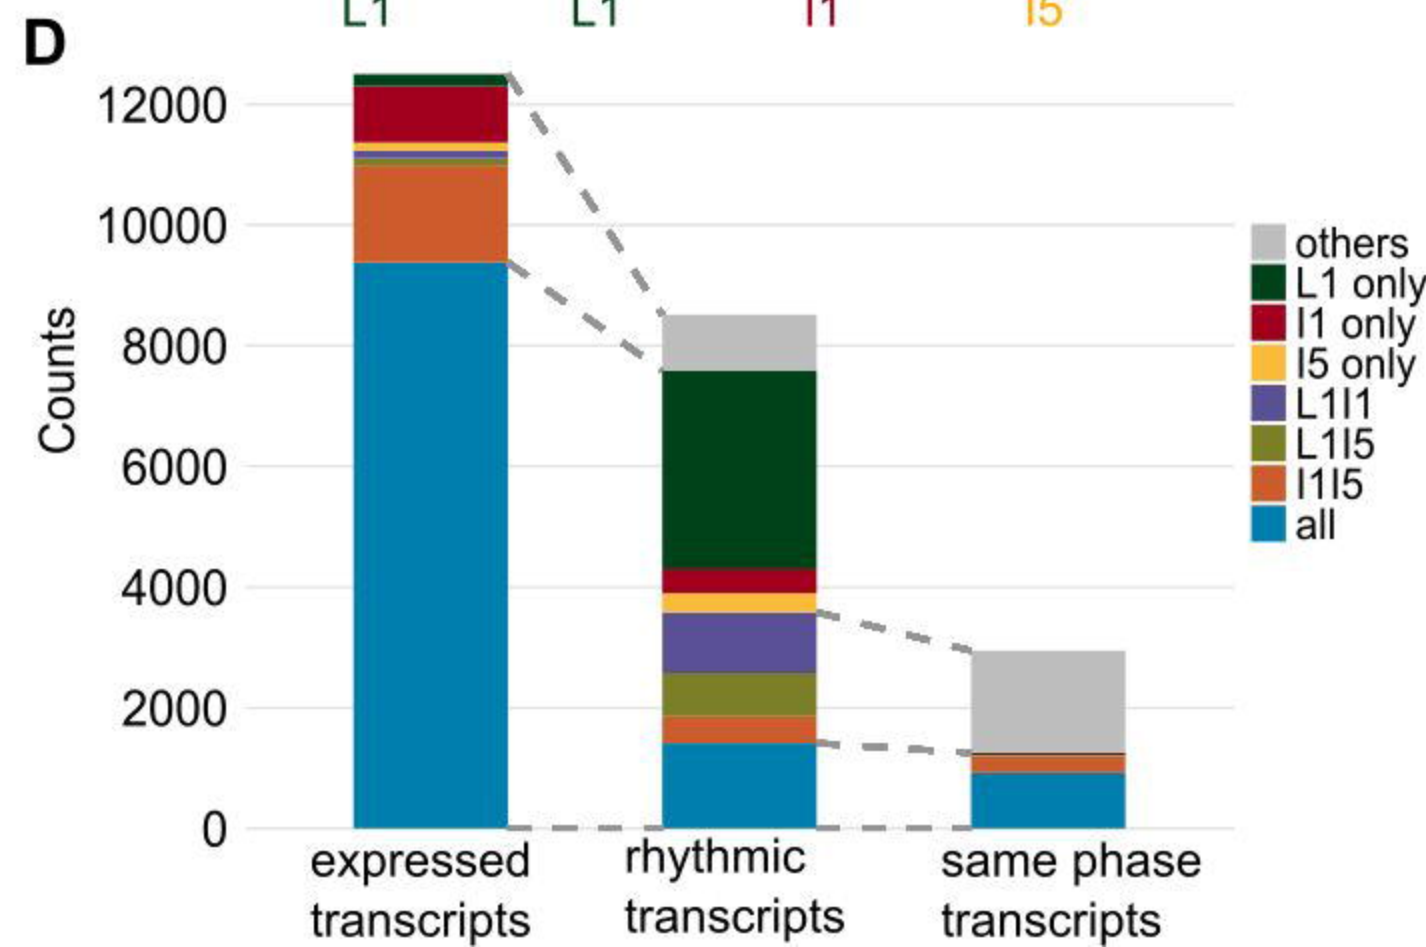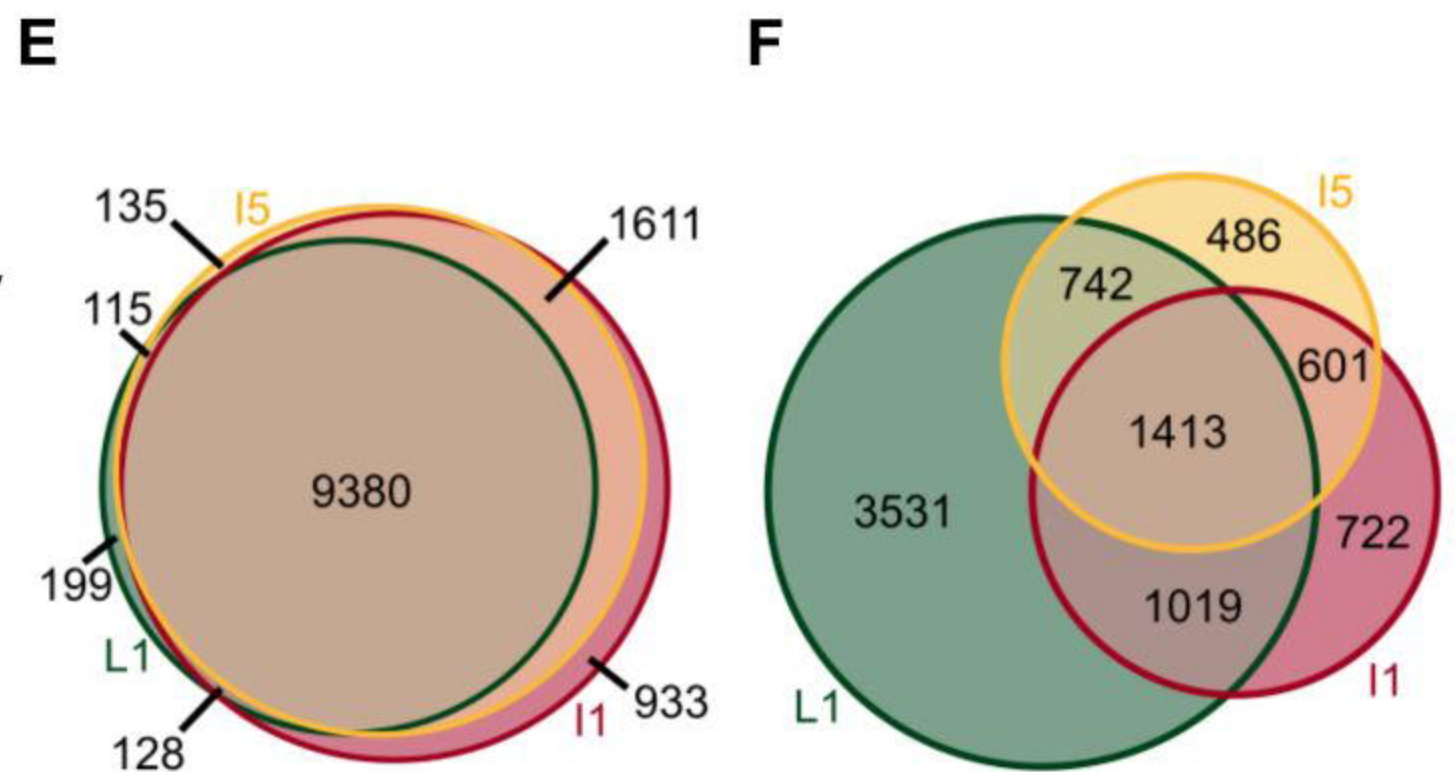



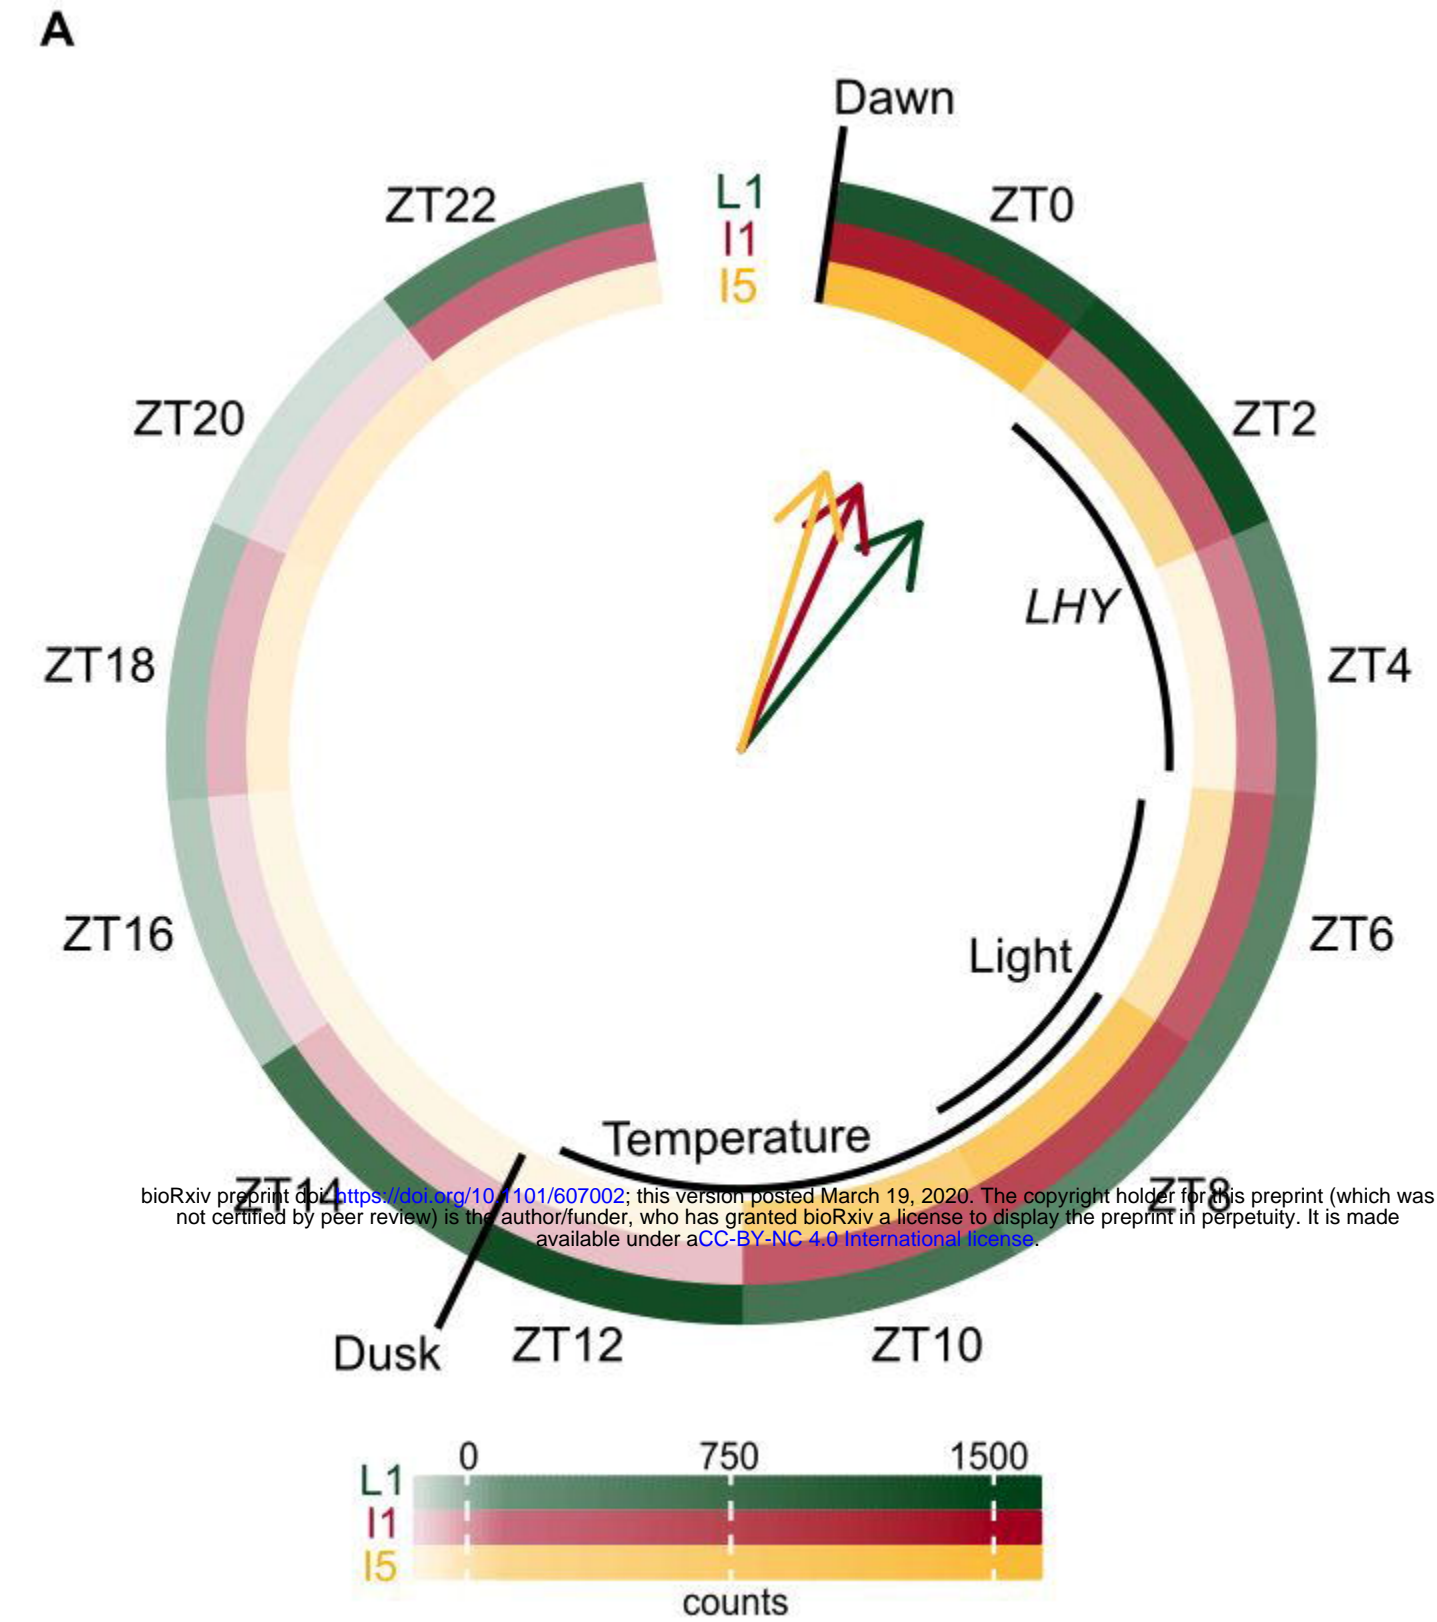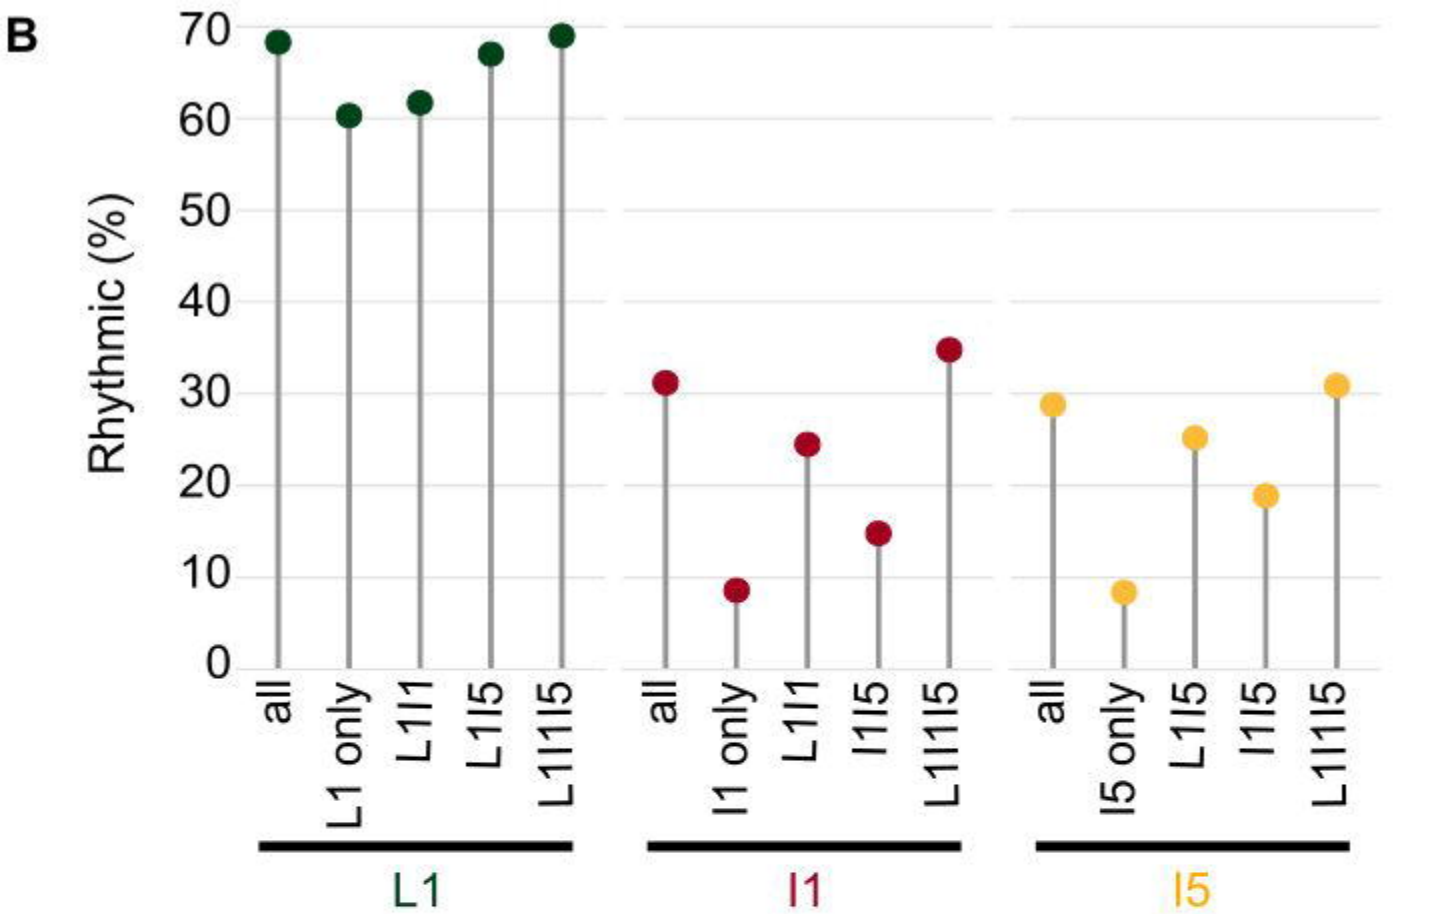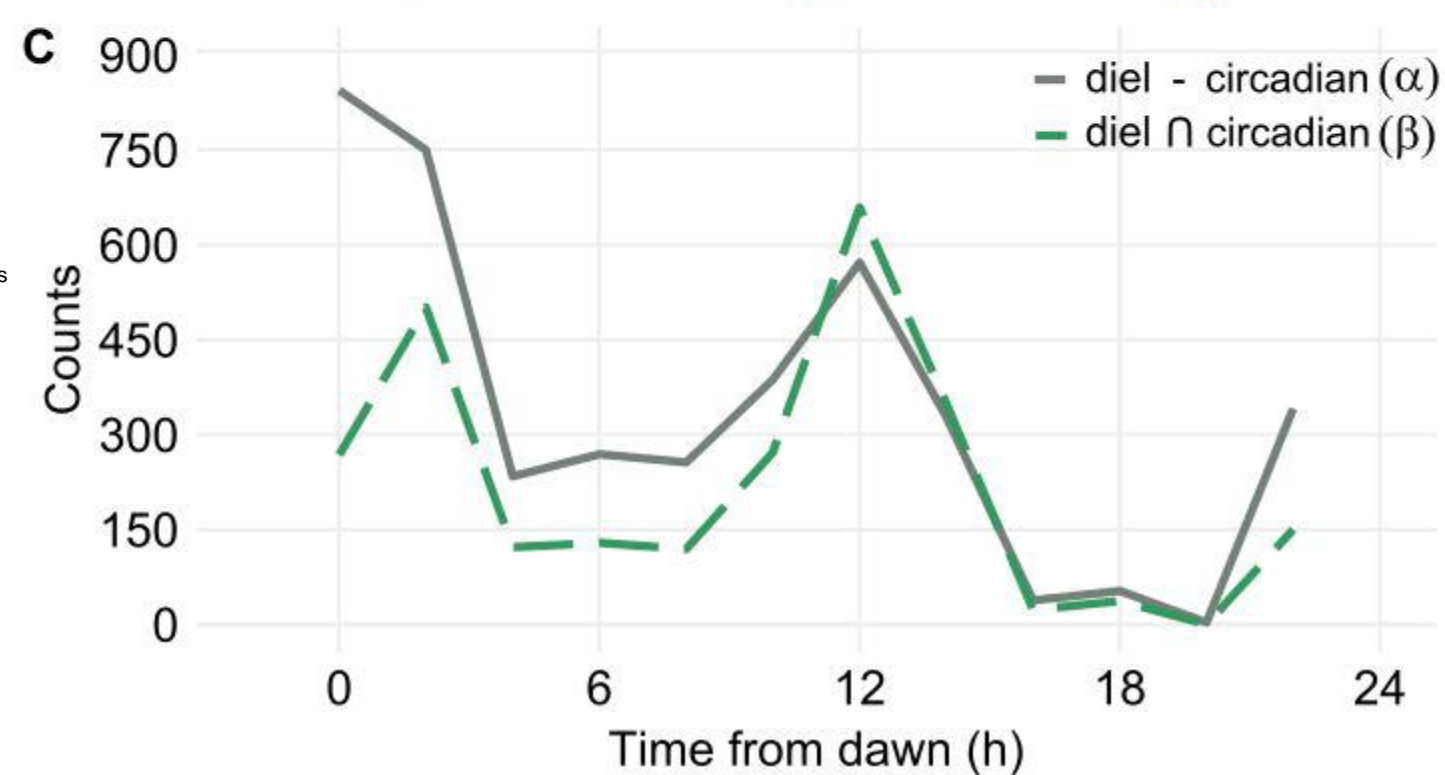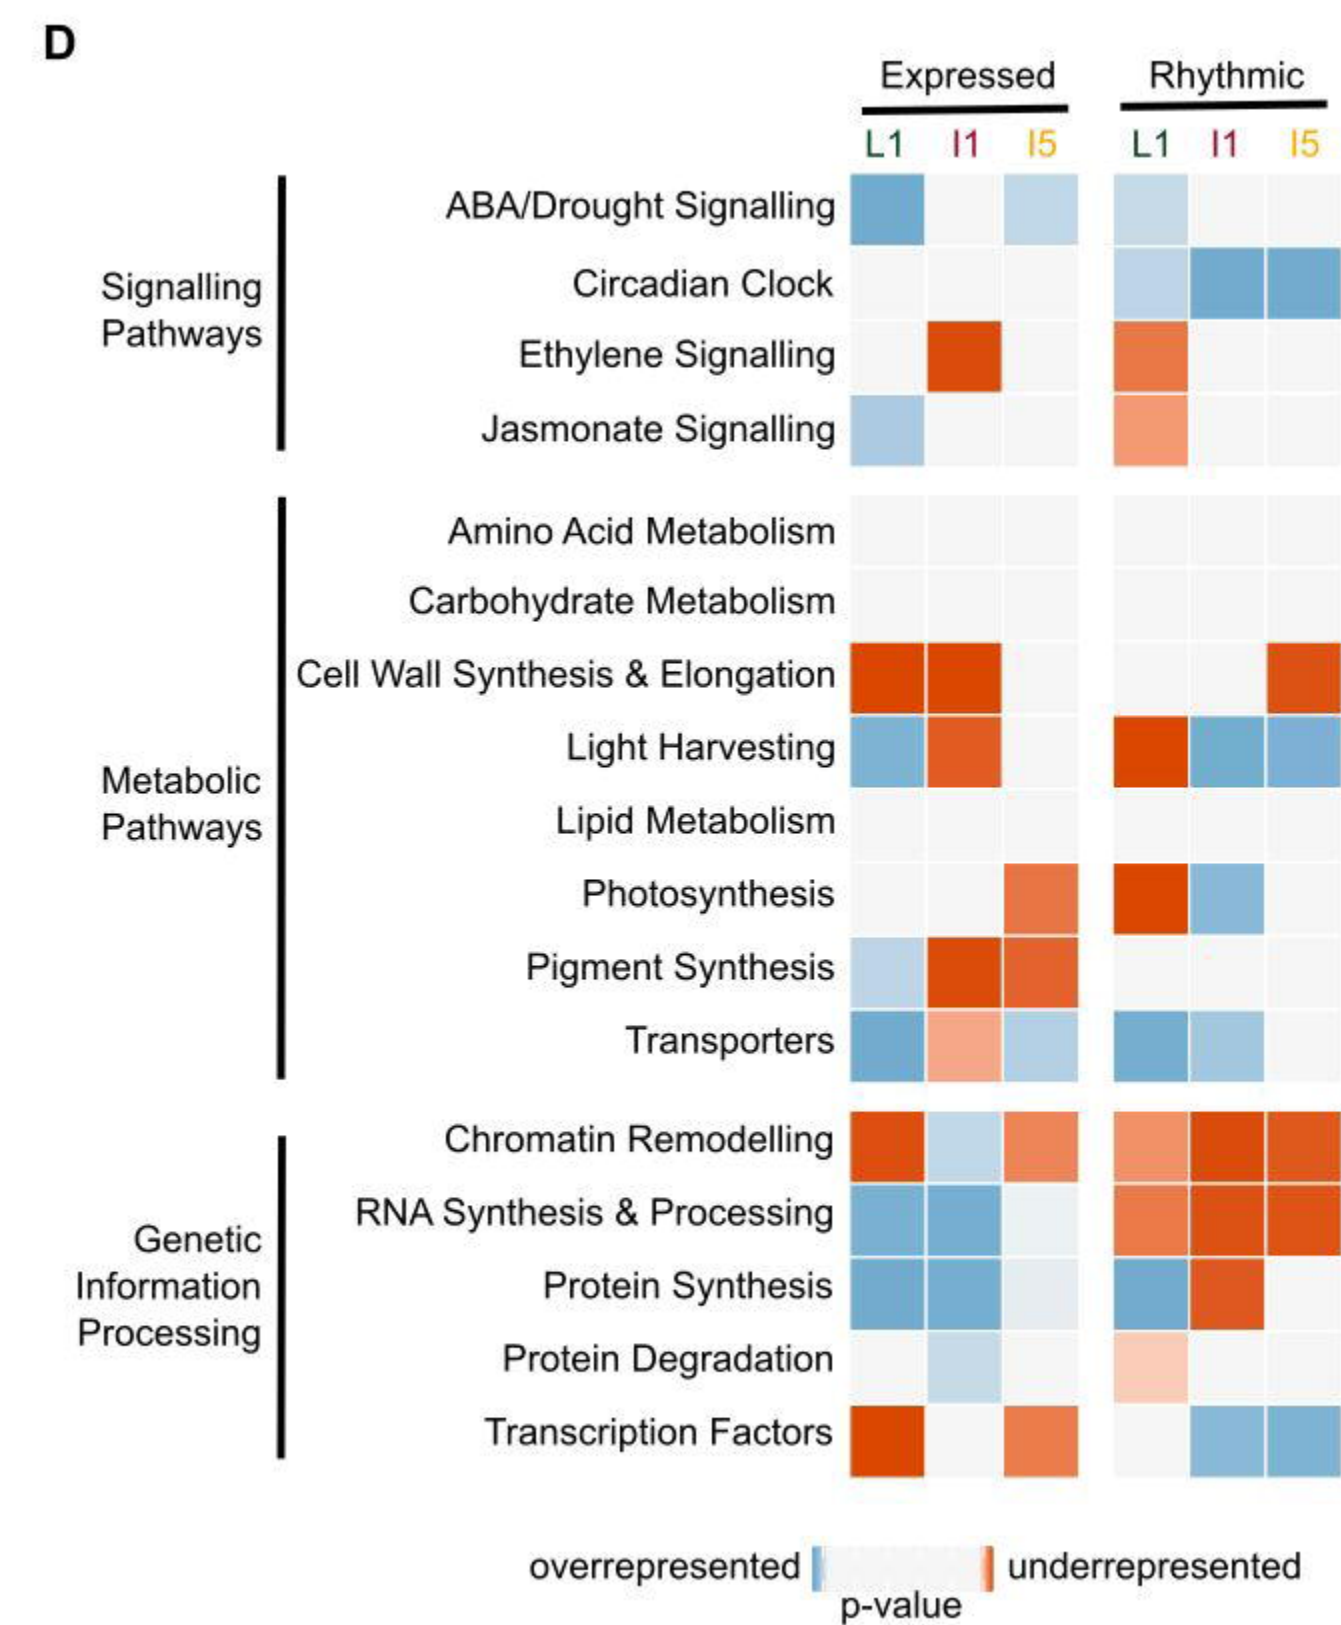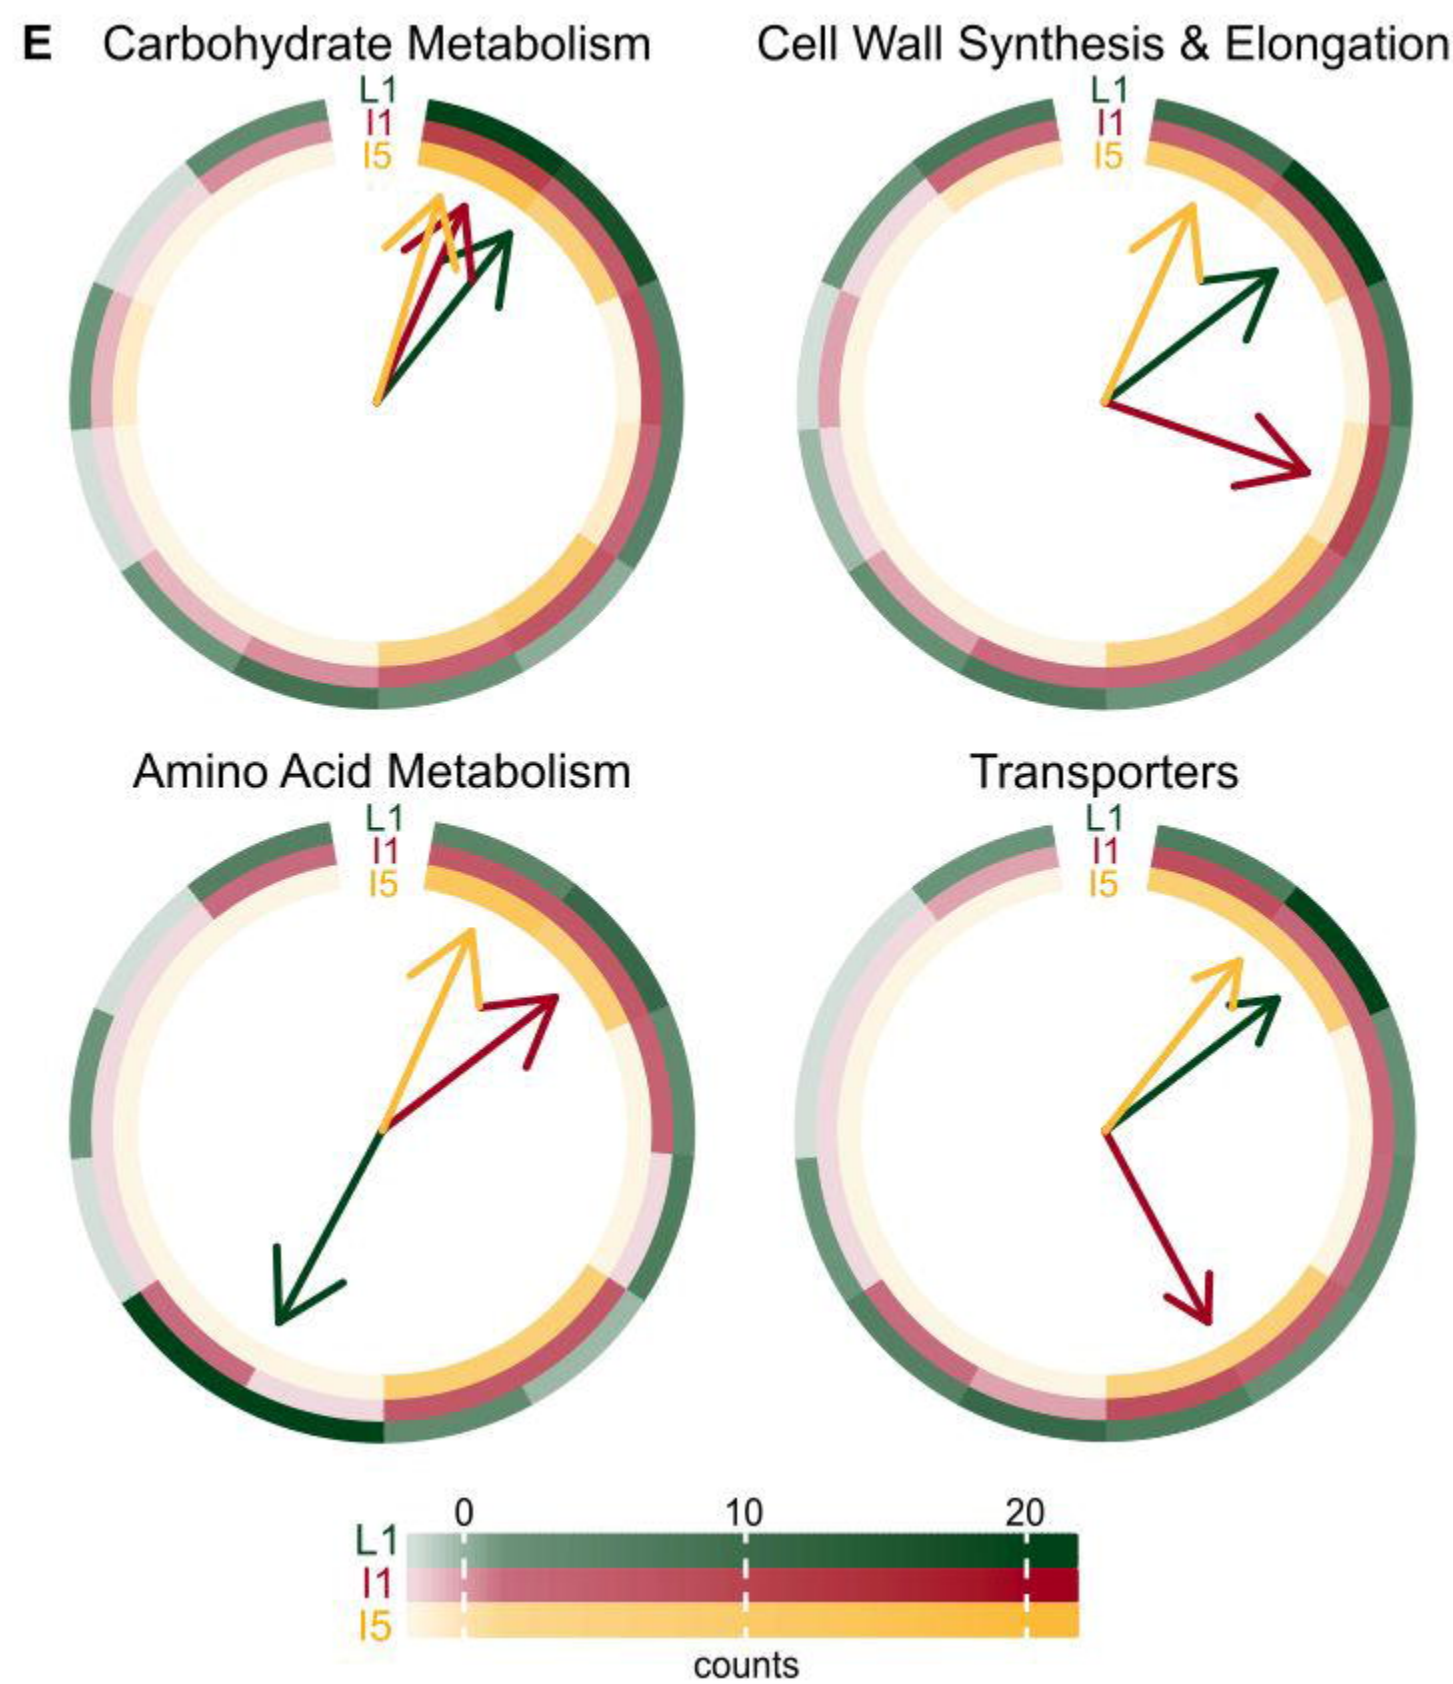



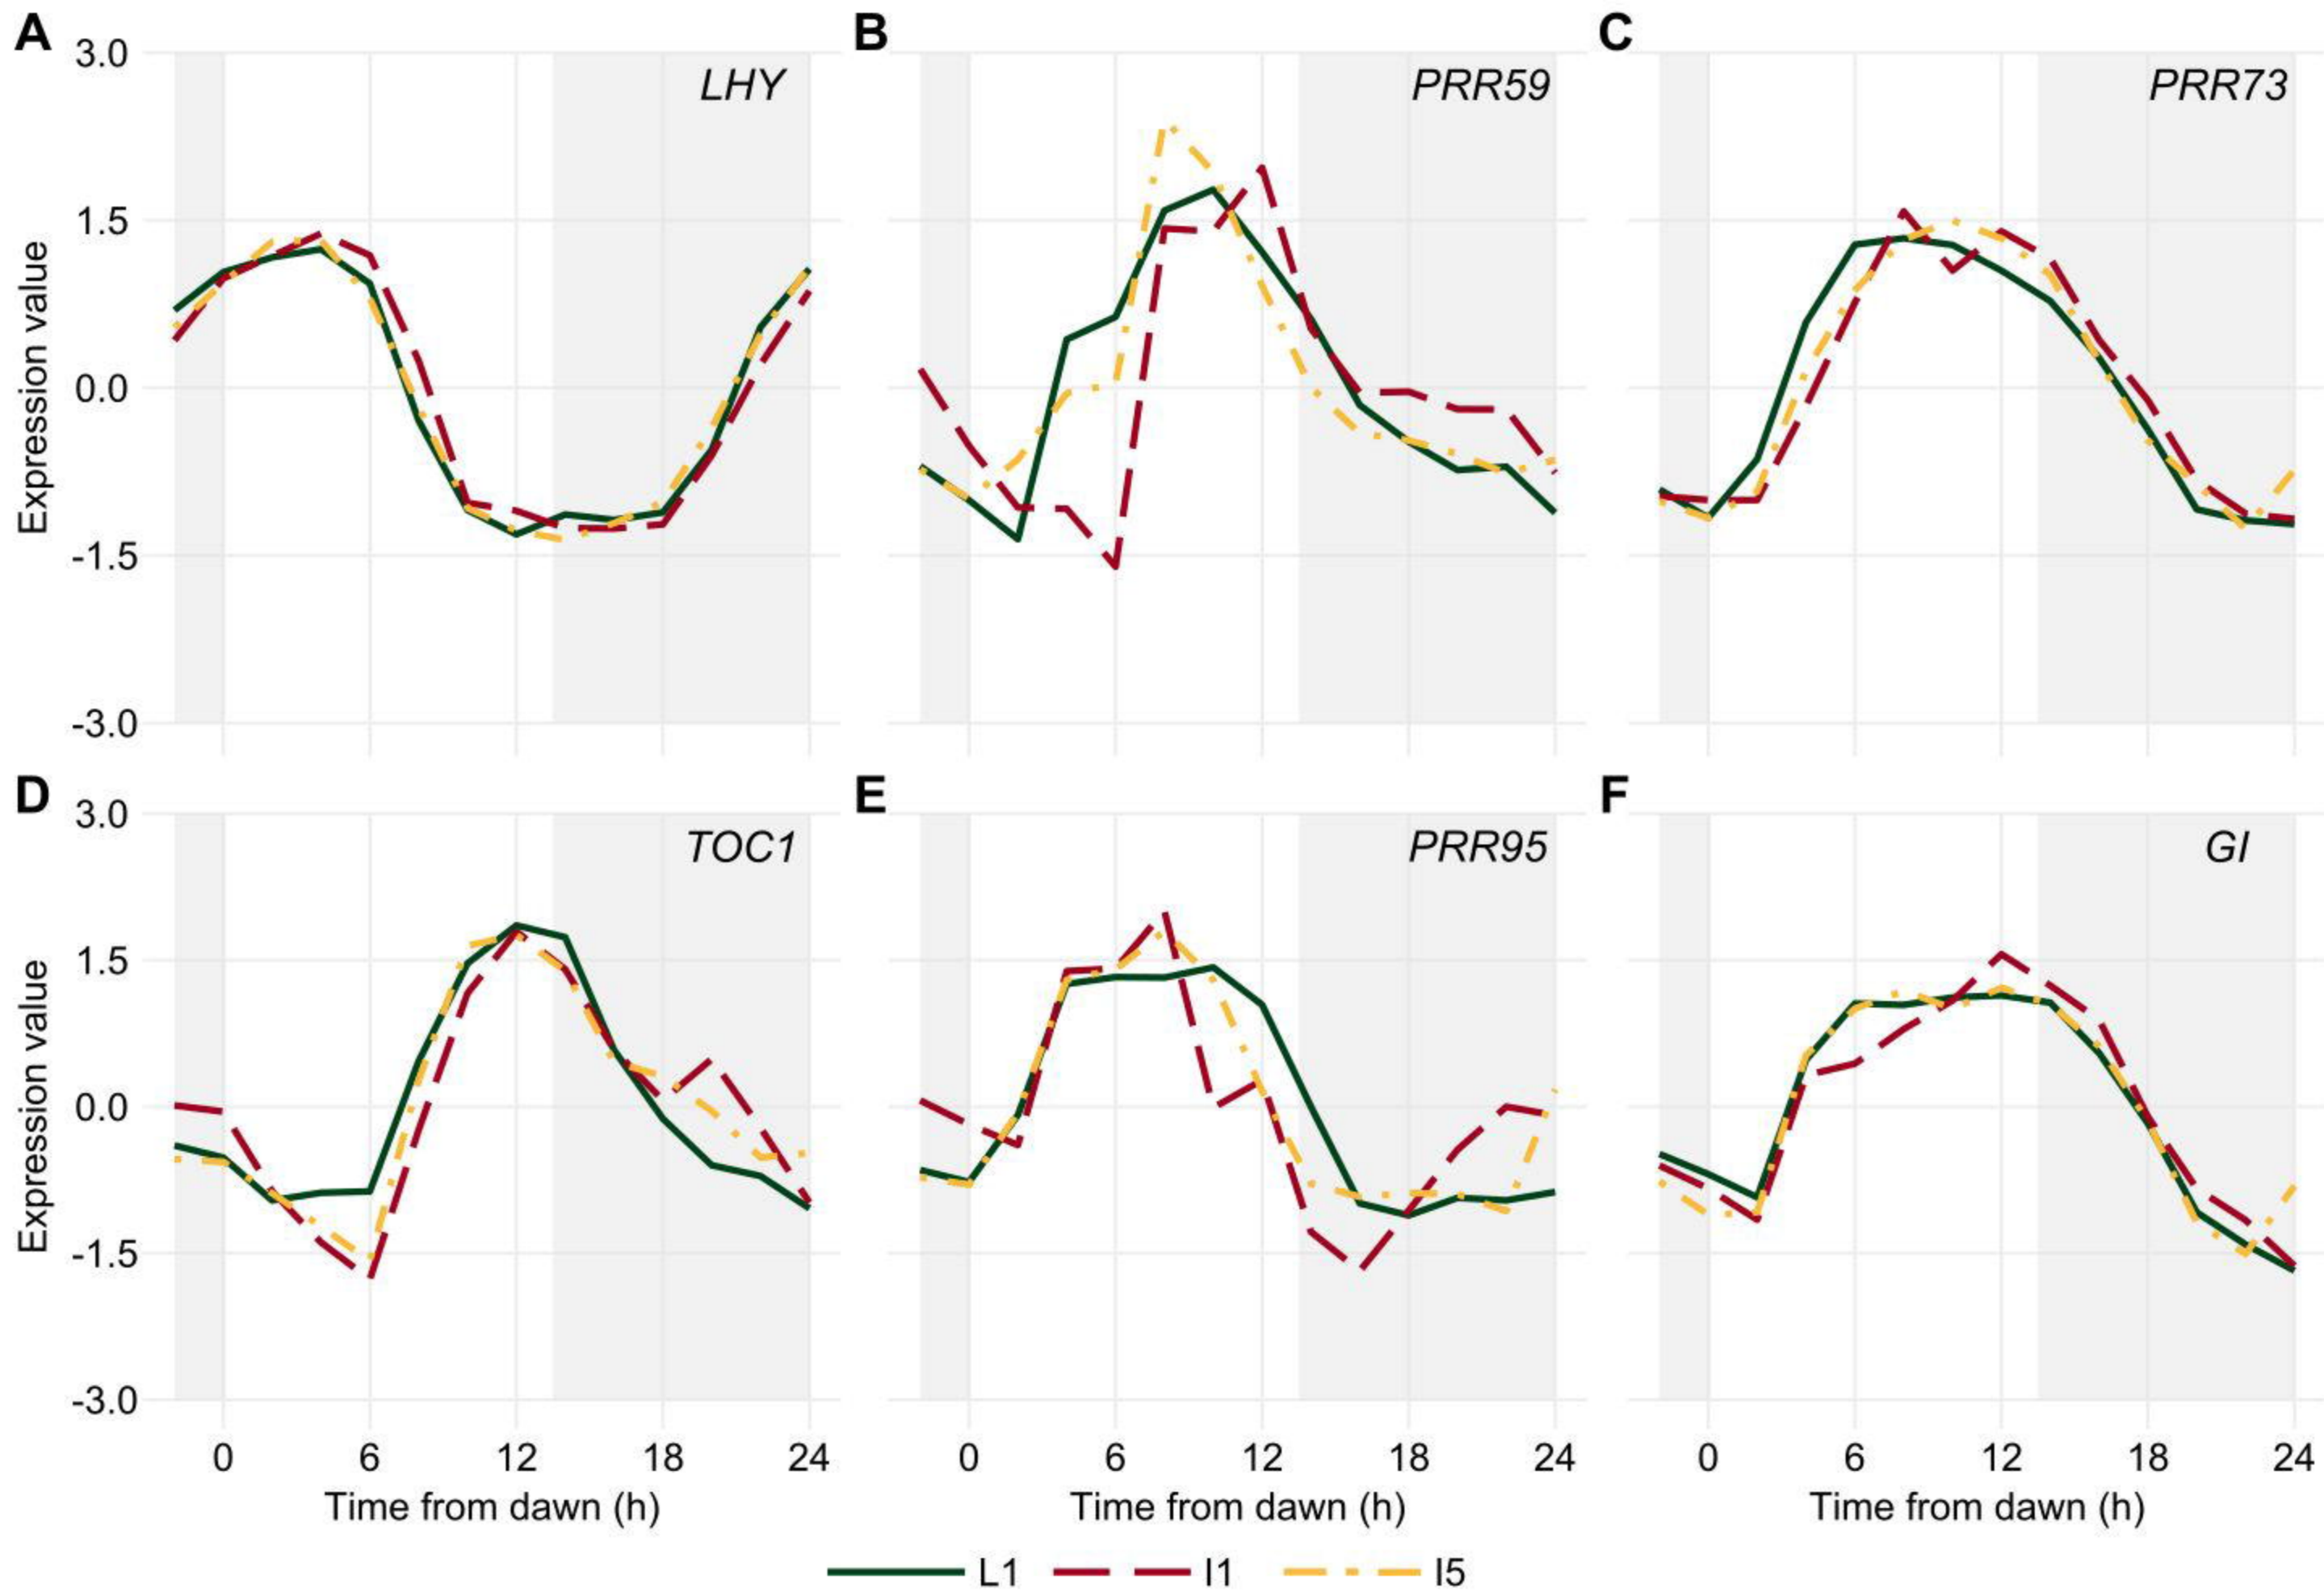



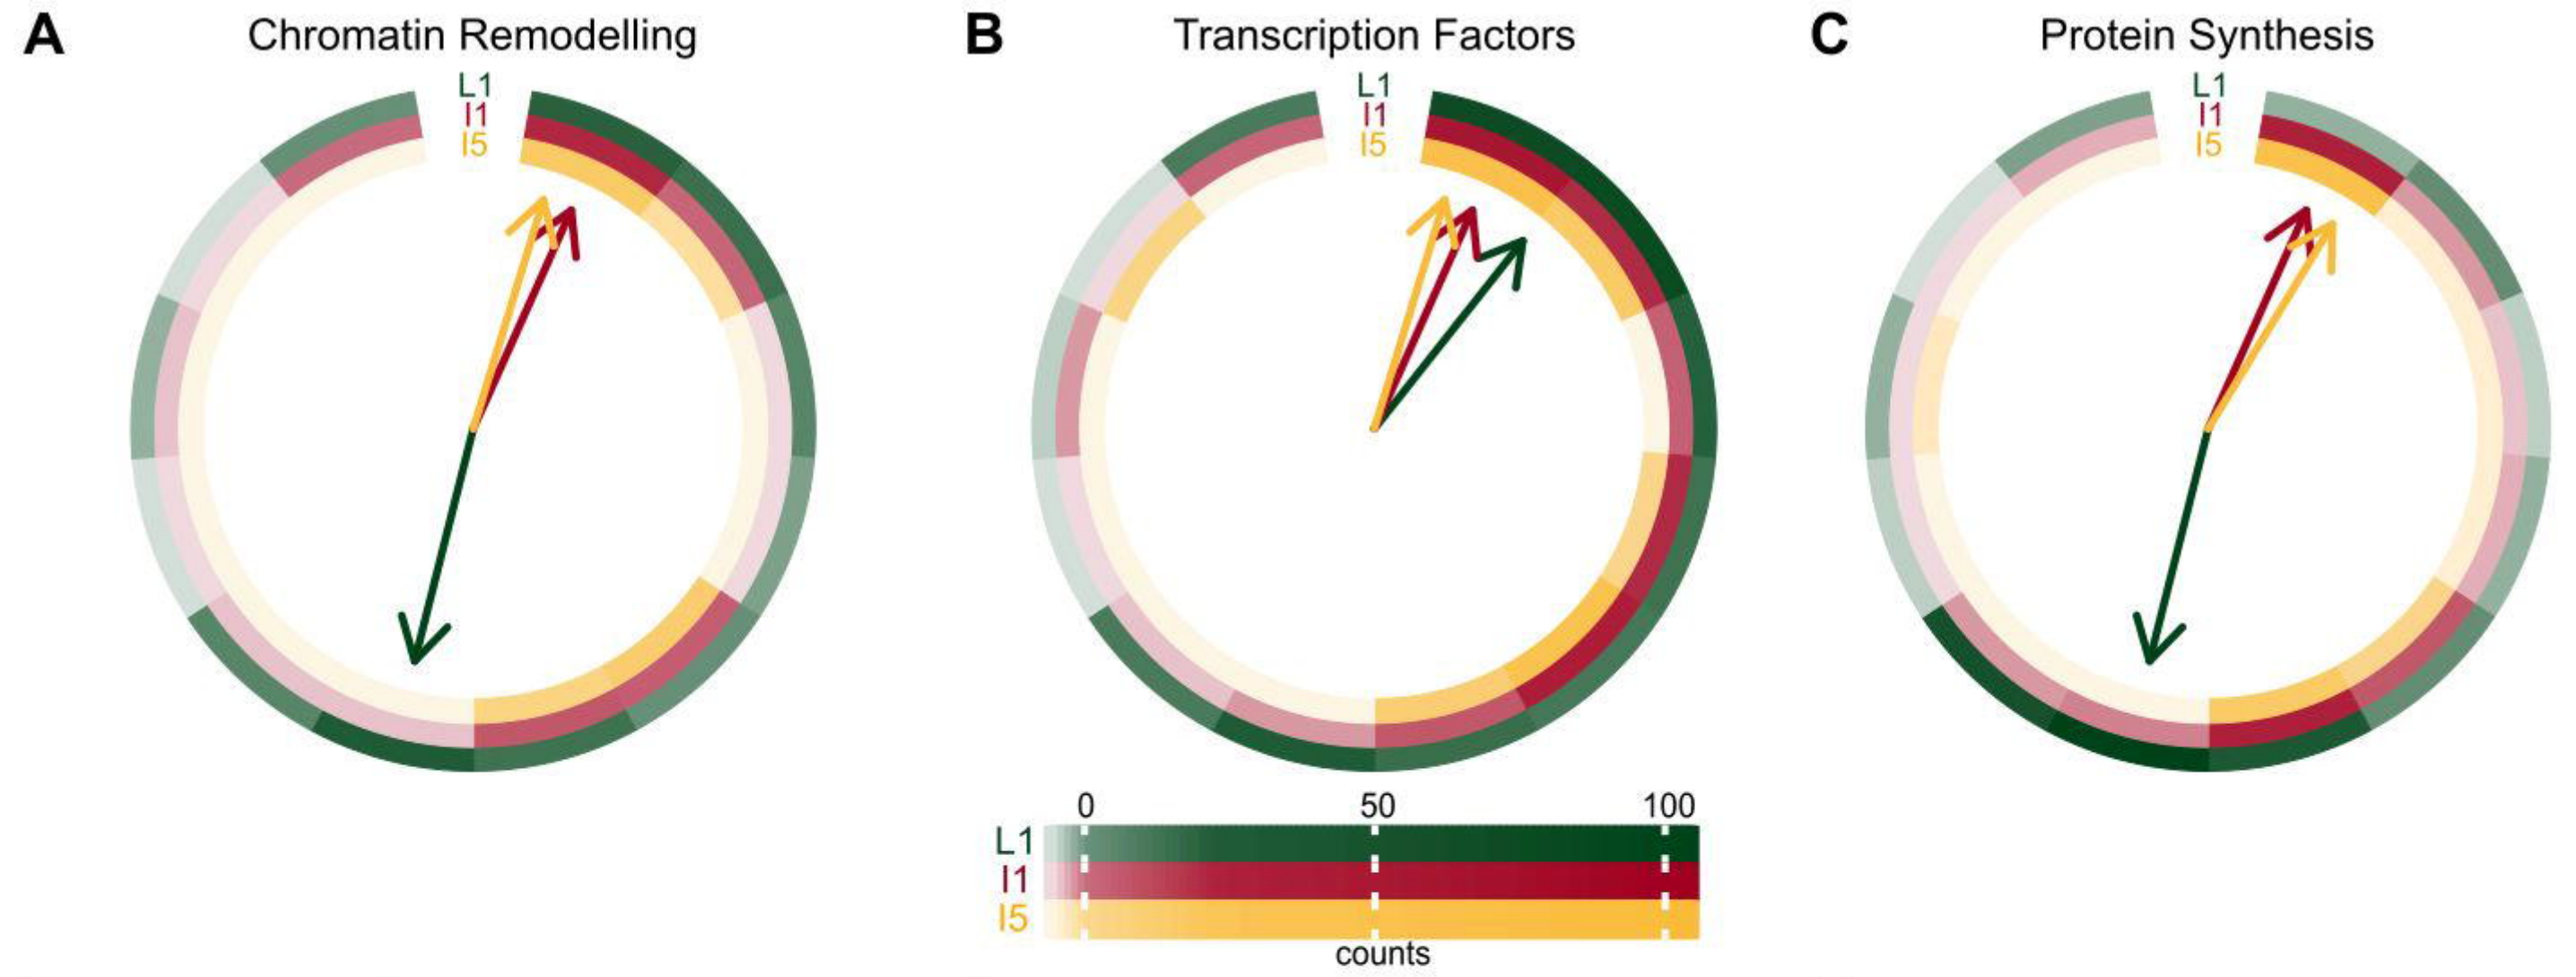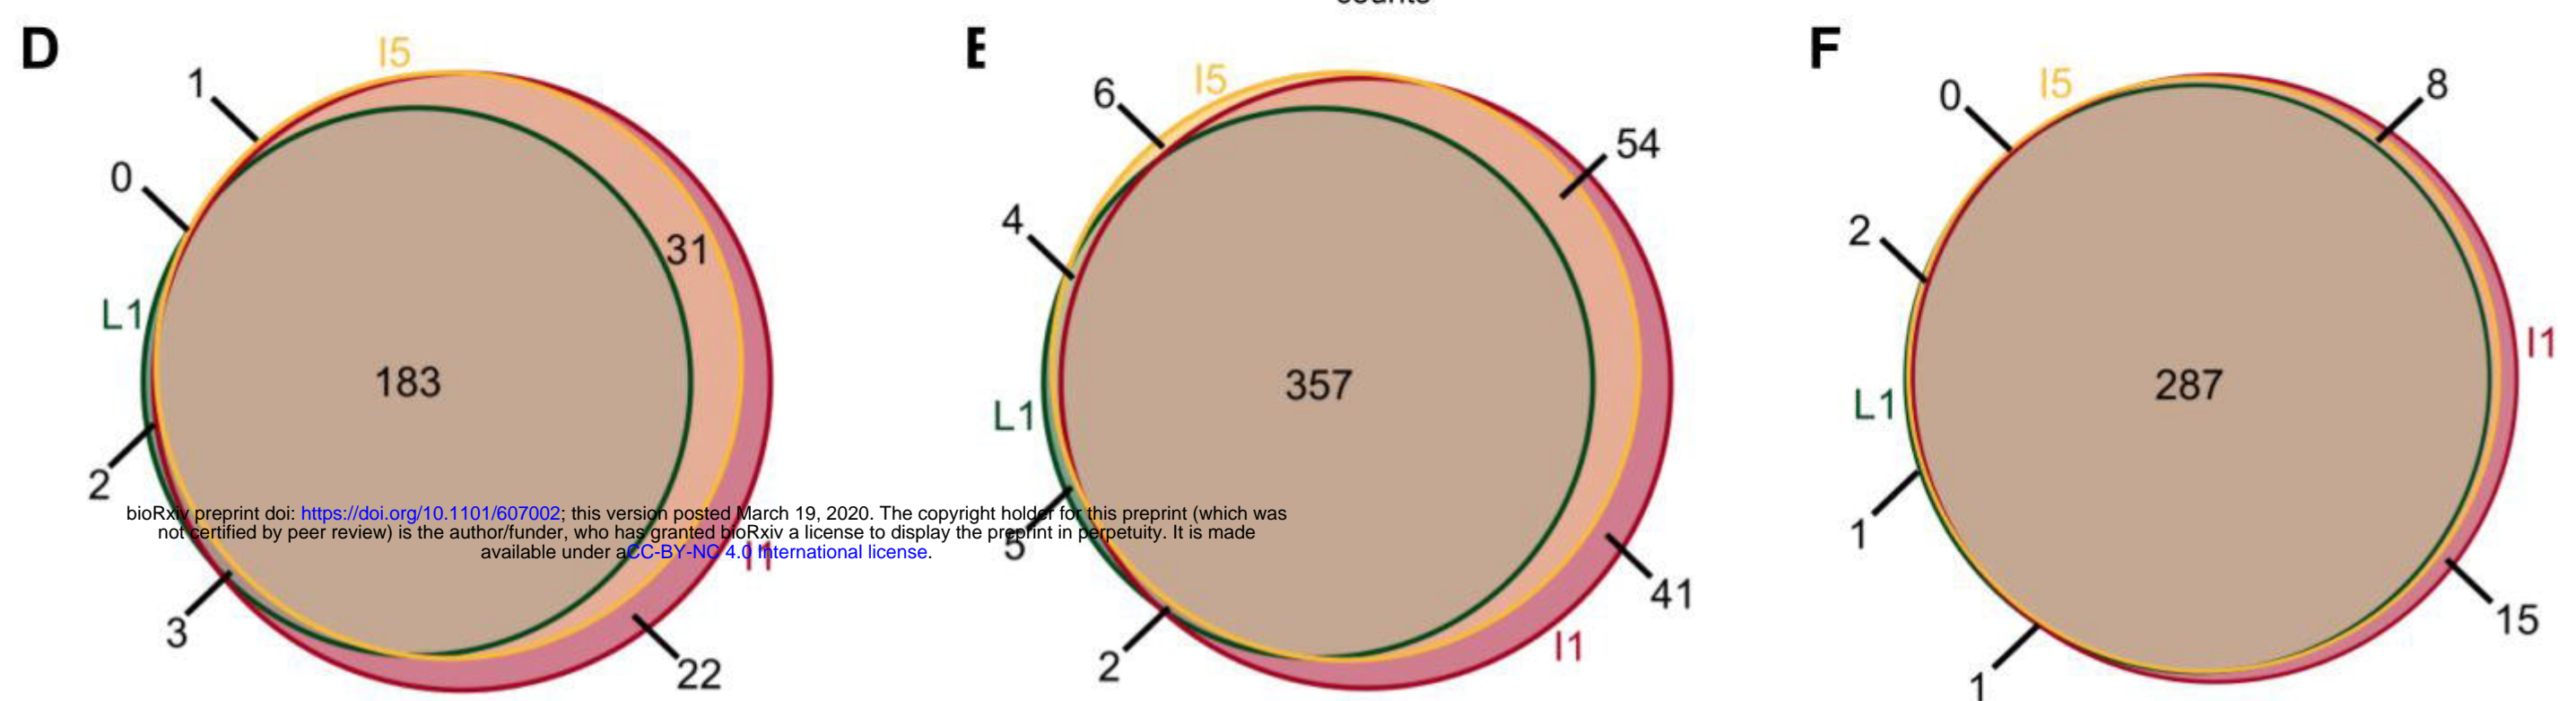

bioRxiv preprint doi: <https://doi.org/10.1101/607002>; this version posted March 19, 2020. The copyright holder for this preprint (which was not certified by peer review) is the author/funder, who has granted bioRxiv a license to display the preprint in perpetuity. It is made available under aCC-BY-NC 4.0 International license.

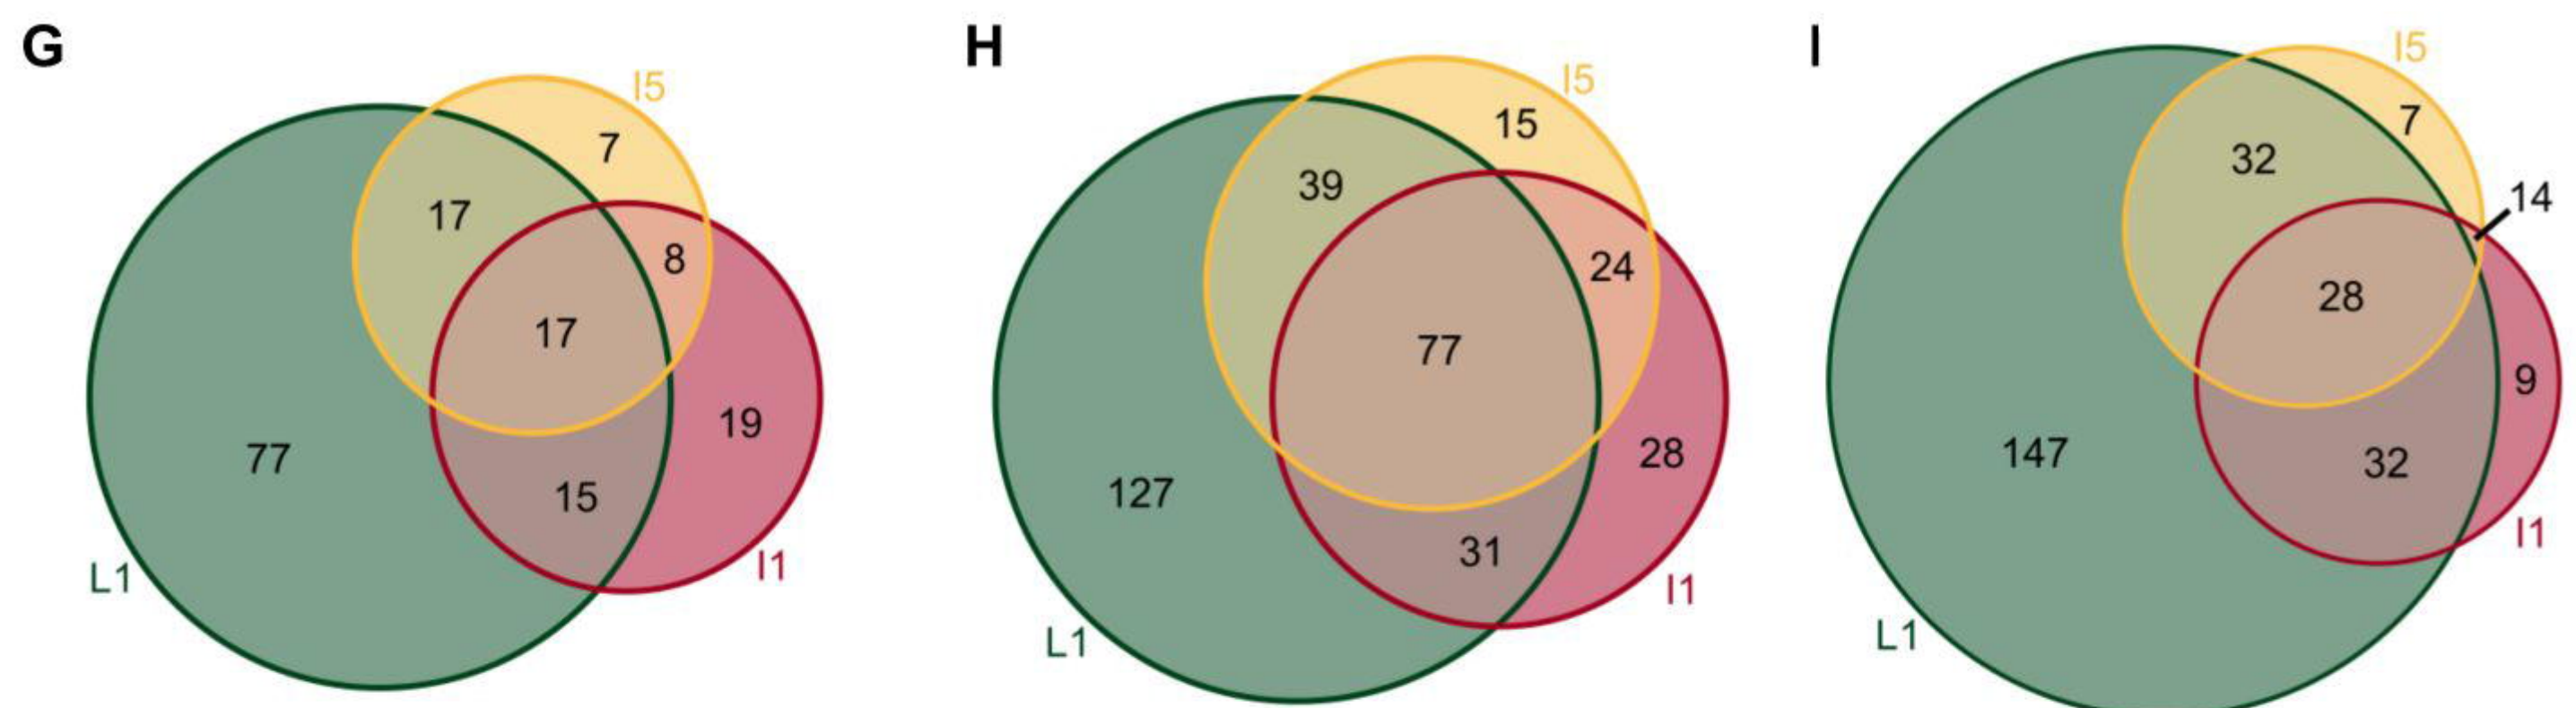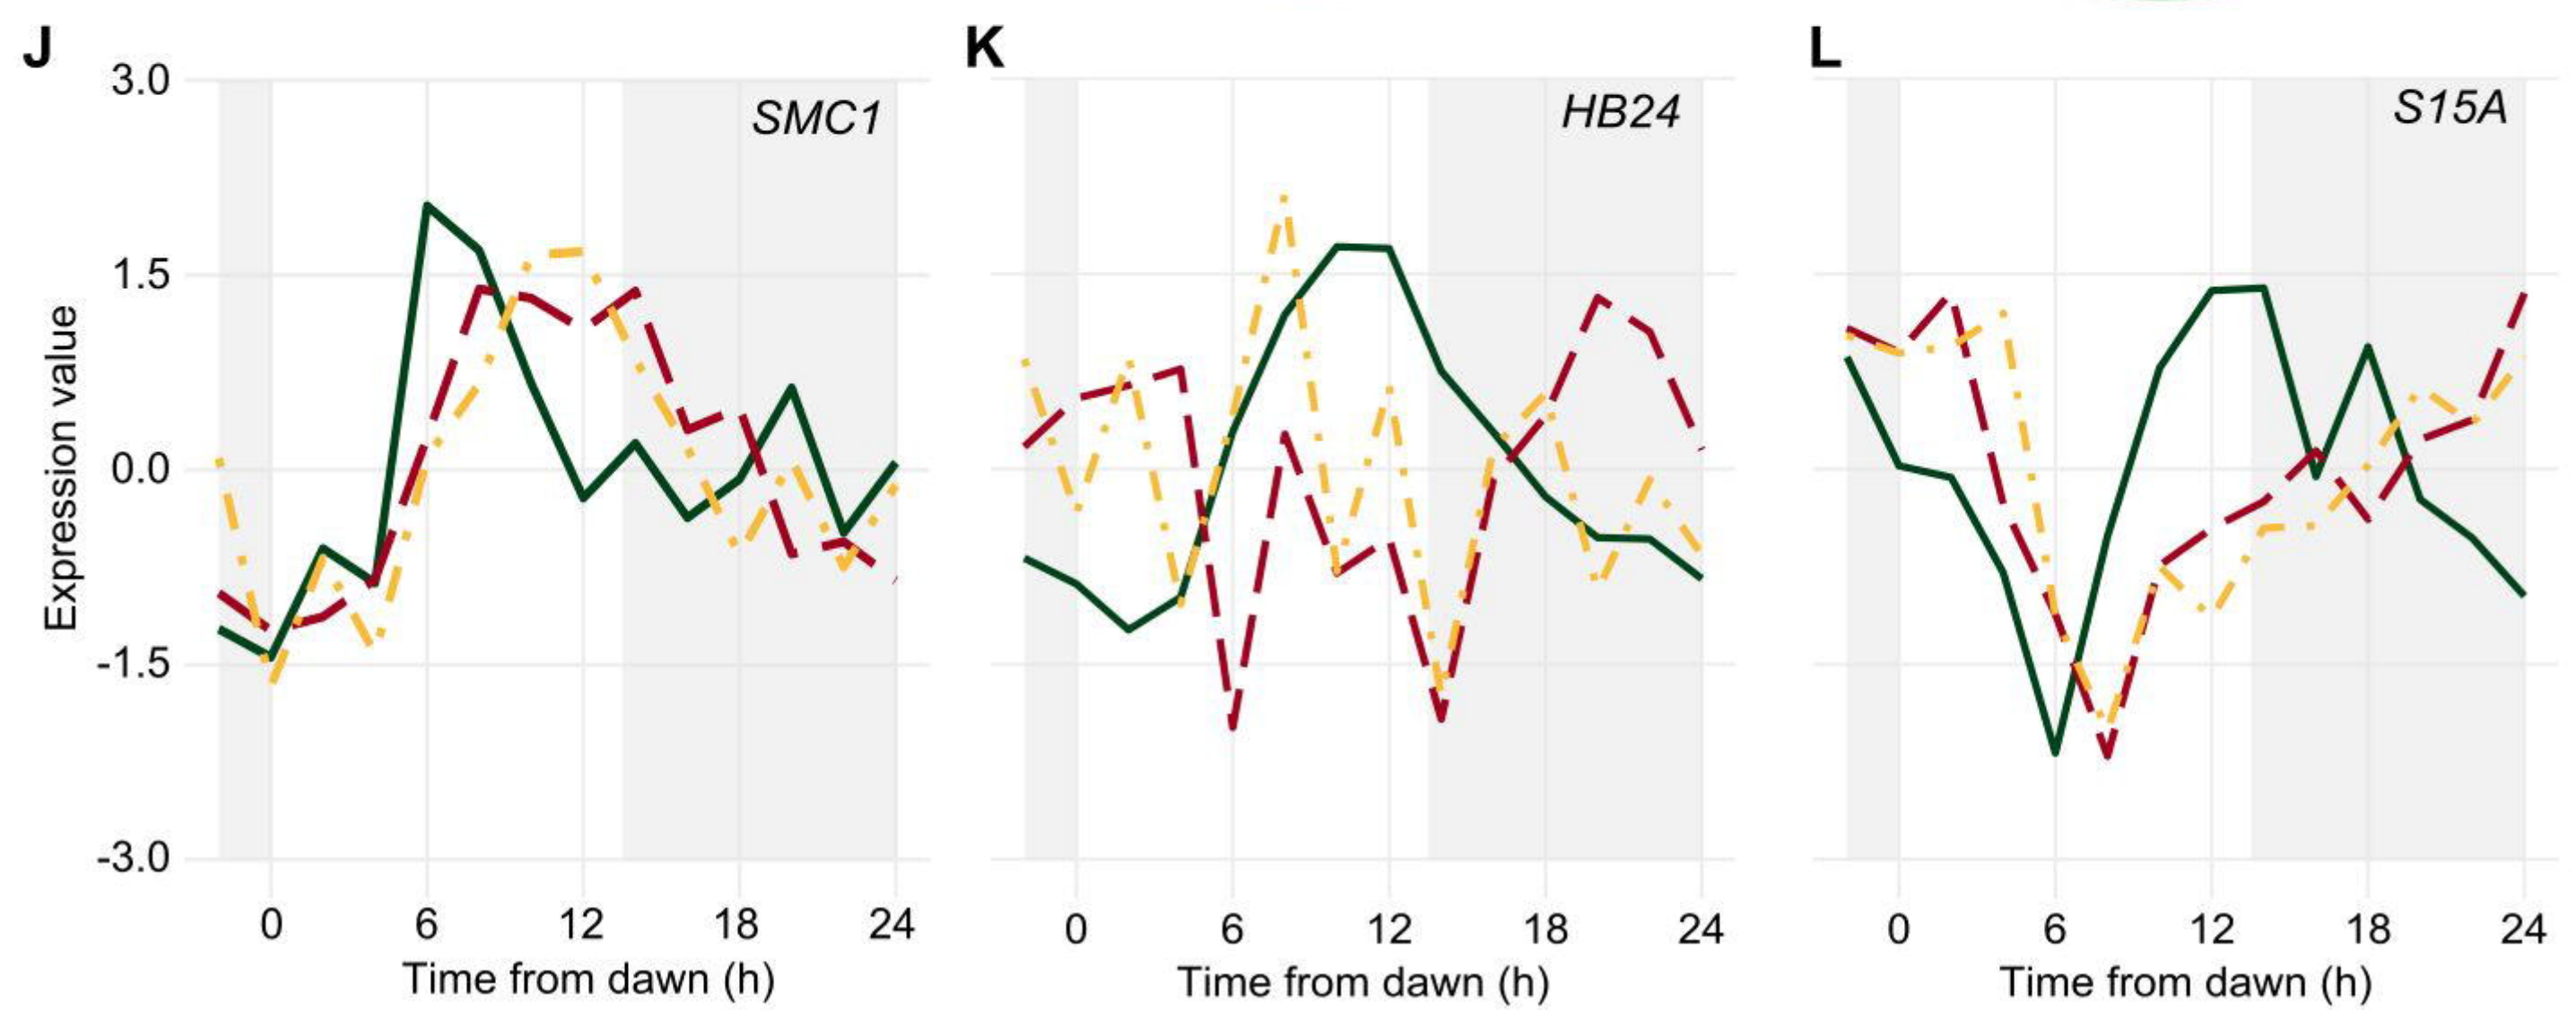

Source: https://www.biorxiv.org/content/10.1101/607002v2.full.pdf
